# Supplementary material for: Analysis of the cryptic biosynthetic gene cluster encoding the RiPP curacozole reveals a phenylalanine-specific peptide hydroxylase
Source: Royal Society of Chemistry journal article supplement (doi:10.1039/d4sc02262a), 2024-01-01
Supplement: d4sc02262a1.pdf [file d4sc02262a1.pdf]

## SUPPLEMENTARY INFORMATION

### **Analysis of the cryptic biosynthetic gene cluster encoding the RiPP curacozole reveals a phenylalanine-specific peptide hydroxylase**

Samantha Hollands<sup>1</sup>, Julia Tasch<sup>2</sup>, David J. Simon<sup>1</sup>, Dimah Wassouf<sup>2</sup>, Isobel Barber<sup>1</sup>,  
Arne Gessner<sup>2,3</sup>, Andreas Bechthold<sup>3</sup>, and David L. Zechel<sup>1\*</sup>

1. Department of Chemistry, Queen's University, 90 Bader Lane, Kingston, Ontario, K7L 3N6, Canada
2. Pharmaceutical Biology and Biotechnology, Institute of Pharmaceutical Sciences, Albert-Ludwigs University, Freiburg, Germany.
3. Institute of Experimental and Clinical Pharmacology and Toxicology, Friedrich-Alexander-Universität Erlangen-Nürnberg, Erlangen, Germany

\*Corresponding Author. DLZ: Email, [dlzechel@chem.queensu.ca](mailto:dlzechel@chem.queensu.ca), Tel. +1 (613) 533-3259

## TABLE OF CONTENTS

|                                                                                                                        |           |
|------------------------------------------------------------------------------------------------------------------------|-----------|
| <b>TABLES</b>                                                                                                          | <b>4</b>  |
| Table S1. Chemical and spectroscopic properties of Curacozole                                                          | 4         |
| Table S2. <sup>1</sup> H NMR and <sup>13</sup> C NMR spectroscopic data for Curacozole ( $\delta$ in ppm, J in Hz).    | 5         |
| Table S3. Predicted functions of <i>czl</i> gene products.                                                             | 7         |
| Table S4. Bacterial strains and plasmids                                                                               | 8         |
| Table S5. Primers for curacozole BGC cloning and mutagenesis                                                           | 9         |
| Table S6. Buffers used for purification of <i>czl</i> specified proteins.                                              | 11        |
| Table S7. Sequences of CzIA and variants used for in vitro assays                                                      | 12        |
| Table S8. Calculated <i>m/z</i> values for CzIA and variants before and after heterocyclization by CzID and CzIBC.     | 13        |
| Table S9. Calculated <i>m/z</i> values for CzIA before and after hydroxylation by CzII.                                | 14        |
| <b>FIGURES</b>                                                                                                         | <b>15</b> |
| Figure S1. Morphological characteristics of <i>S. curacoii</i> in response to constitutive expression of <i>bldA</i> . | 15        |
| Figure S2. Key NMR correlation data for Curacozole.                                                                    | 16        |
| Figure S3. A composite of MS <sup>2</sup> and MS <sup>3</sup> CID spectra for Curacozole.                              | 17        |
| Figure S4. <sup>1</sup> H-NMR spectrum of Curacozole (700 MHz, CDCl <sub>3</sub> )                                     | 18        |
| Figure S5. SDS-PAGE analysis of purified CzIA and variants.                                                            | 20        |
| Figure S6. SDS-PAGE analysis of purified CzID.                                                                         | 21        |
| Figure S7. SDS-PAGE analysis of purified CzIBC.                                                                        | 22        |
| Figure S8. SDS-PAGE analysis of purified CzII.                                                                         | 23        |
| Figure S9. Supporting structural predictions for CzID and CzIBC AlphaFold models.                                      | 24        |
| Figure S10. Structure based sequence alignment of CzID and LynD                                                        | 26        |
| Figure S11. Structural predictions for CzID/BC/A heteromeric complexes.                                                | 27        |
| Figure S12. Structure based sequence alignment of CzIBC and ThcOx (5LQ4-B).                                            | 28        |
| Figure S13. CzIA is not modified by CzID without CzIBC.                                                                | 29        |
| Figure S14. CzID and CzIBC form one heterocycle on CzIA and variants.                                                  | 30        |

|                                                                                               |           |
|-----------------------------------------------------------------------------------------------|-----------|
| Figure S15. MS/MS sequencing of oxazole-containing CzIA C24S/S25S.                            | 32        |
| Figure S16. Supporting structural predictions for CzII AlphaFold models.                      | 33        |
| Figure S17. Structural alignment of CzII with asparaginyl hydroxylase YxbC                    | 34        |
| Figure S18. Hydroxylation of CzIA by the Fe/2OG dioxygenase CzII                              | 35        |
| Figure S19. CzIA F18G is not modified by CzII                                                 | 36        |
| Figure S20. The Fe/2OG dioxygenase CzII creates a tyrosine residue on precursor peptide CzIA. | 37        |
| Figure S21. UPLC-MS analysis of dansylated tyrosine structural isomers.                       | 38        |
| <b>SUPPLEMENTARY EXPERIMENTAL METHODS</b>                                                     | <b>39</b> |
| General                                                                                       | 39        |
| Large scale production and purification of curacozole                                         | 40        |
| Cloning and Mutagenesis of the Curacozole BGC                                                 | 40        |
| Generation of pTESa-czI, pTESa-cz/ΔI, and pTESa-cz/ΔJK                                        | 40        |
| Generation of pTESa-cz/ΔC1, pTESa-cz/ΔD, pTESa-cz/ΔF, pTESa-cz/ΔBC                            | 41        |
| Deletion of cz/B1 and cz/E in <i>S. curacoi</i> / pTESa-bldA                                  | 42        |
| Generation of point mutations in czIA and heterologous production of curacozole derivatives   | 44        |
| DNA transformation into <i>E. coli</i> BW25113 / pIJ790 cells by electroporation              | 46        |
| Plasmid transformation into <i>Streptomyces</i> by intergeneric conjugation                   | 46        |
| Cultivation of <i>Streptomyces</i> strains for analysis of curacozole and derivatives         | 47        |
| Cloning of czI specified proteins                                                             | 47        |
| Expression and purification of czI specified proteins.                                        | 49        |
| AlphaFold predictions and structural analysis                                                 | 50        |
| CzID and CzIBC Activity Assays                                                                | 51        |
| CzII Activity Assay                                                                           | 51        |
| LC-MS analysis of curacozole and derivatives                                                  | 52        |
| UPLC-MS Analysis of CzIA                                                                      | 52        |
| LC-MS/MS Peptide Sequencing of CzIA                                                           | 53        |
| UPLC-MS Analysis of Dansylated Amino Acids Derived from CzIA                                  | 54        |
| <b>REFERENCES</b>                                                                             | <b>55</b> |

## TABLES

Table S1. Chemical and spectroscopic properties of Curacozole

---

|                                                                   |                                                                              |
|-------------------------------------------------------------------|------------------------------------------------------------------------------|
| Appearance                                                        | Yellowish-white solid                                                        |
| Molecular Formula                                                 | C <sub>36</sub> H <sub>36</sub> N <sub>8</sub> O <sub>6</sub> S <sub>2</sub> |
| HR-ESI-MS ( <i>m/z</i> )                                          |                                                                              |
| Found                                                             | 741.22699 [M + H] <sup>+</sup>                                               |
| Calcd.                                                            | 741.22775                                                                    |
| [α] <sup>25</sup> <sub>D</sub> (CH <sub>2</sub> Cl <sub>2</sub> ) | +0.955                                                                       |
| UV λ <sub>max</sub> nm (CH <sub>2</sub> Cl <sub>2</sub> )         | 271, 303                                                                     |
| IR ν <sub>max</sub> (neat) cm <sup>-1</sup>                       | 3341, 3069, 2961, 2929, 2874, 1658, 1497, 1097, 1048                         |

---

**Table S2.  $^1\text{H}$  NMR and  $^{13}\text{C}$  NMR spectroscopic data for Curacozole ( $\delta$  in ppm,  $J$  in Hz). For atom numbering scheme and a summary of correlations, see Figure S2.**

| Position  | $\delta_{\text{C}}^{[a]}$ | $\delta_{\text{H}}$<br>(mult., $J$ ) <sup>[b]</sup>                          | $^1\text{H}$ - $^{13}\text{C}$ HMBC | $\delta_{\text{N}}^{[c]}$ | $^1\text{H}$ - $^{15}\text{N}$ HMBC |
|-----------|---------------------------|------------------------------------------------------------------------------|-------------------------------------|---------------------------|-------------------------------------|
| 1         | 129.71, C                 | -                                                                            |                                     |                           |                                     |
| 2         | 153.11, C                 | -                                                                            |                                     |                           |                                     |
| 3         | 126.81, C                 | -                                                                            |                                     |                           |                                     |
| 4         | 128.21, CH                | 8.38 (d, 7.6)                                                                | C-2, C-5, C-6                       |                           |                                     |
| 5         | 128.51, CH                | 7.45 (t, 7.4)                                                                | C-2(w), C-3, C-4                    |                           |                                     |
| 6         | 130.25, CH                | 7.39 (t, 7.1)                                                                |                                     |                           |                                     |
| 7         | 128.51, CH                | 7.45 (t, 7.4)                                                                | C-2(w), C-3, C-4                    |                           |                                     |
| 8         | 128.21, CH                | 8.38 (d, 7.6)                                                                | C-2, C-5, C-6                       |                           |                                     |
| 9         | 161.56, C                 |                                                                              |                                     |                           |                                     |
| 10 (Ile1) | 57.73, CH                 | 4.97 (dd, 9.7, 5.0)                                                          | N-2, C-12, C-13, C-15               |                           | N-2, N-3                            |
| 11 (Ile1) | 37.54, CH                 | 2.30 (m)                                                                     | C-10, C-12, C-13, C-14, C-15        |                           | N-2                                 |
| 12 (Ile1) | 15.08, CH <sub>3</sub>    | 1.10 (d, 6.8)                                                                | C-10, C-11, C-13                    |                           |                                     |
| 13 (Ile1) | 26.49, CH <sub>2</sub>    | H <sub>a</sub> , 1.27 (m)<br>H <sub>b</sub> , 1.46 (m)                       |                                     |                           |                                     |
| 14 (Ile1) | 11.70, CH <sub>3</sub>    | 0.87 (t, 7.3)                                                                | C-11, C-13                          |                           |                                     |
| 15 (Ile1) | 173.36, C                 |                                                                              |                                     |                           |                                     |
| 16 (Ile2) | 59.15, CH                 | 4.45 (t, 6.3)                                                                | N-2, C-12, C-13, C-21               |                           | N-3, N-4                            |
| 17 (Ile2) | 36.08, CH                 | 2.08 (m)                                                                     | C-16, C-18, C-19, C-20              |                           |                                     |
| 18 (Ile2) | 16.15, CH <sub>3</sub>    | 0.93 (d, 6.8)                                                                | C-16, C-17, C-19                    |                           |                                     |
| 19 (Ile2) | 25.39, CH <sub>2</sub>    | H <sub>a</sub> , 1.24 (m)<br>H <sub>b</sub> , 1.51 (m)                       |                                     |                           |                                     |
| 20 (Ile2) | 11.60, CH <sub>3</sub>    | 0.78 (t, 7.3)                                                                | C-17, C-19                          |                           |                                     |
| 21 (Ile2) | 171.82, sC                |                                                                              |                                     |                           |                                     |
| 22 (Gly)  | 36.85, CH <sub>2</sub>    | H <sub>a</sub> , 4.25 (br. d, 17.5)<br>H <sub>b</sub> , 5.08 (dd, 17.8, 7.6) | C-23, C-21                          |                           | N-4, N-5                            |

|                 |                         |                   |                        |            |               |
|-----------------|-------------------------|-------------------|------------------------|------------|---------------|
| <b>23 (Gly)</b> | 162.32, C               |                   |                        |            |               |
| <b>24</b>       | 138.58, CH <sub>2</sub> | 8.09 (s)          | C-23, C-25             |            |               |
| <b>25</b>       | 129.66, C               | -                 |                        |            |               |
| <b>26</b>       | 153.84, C               | -                 |                        |            |               |
| <b>27</b>       | 148.12, C               | -                 |                        |            |               |
| <b>28</b>       | 11.91, CH <sub>3</sub>  | 2.62 (s)          | C-29, C-30, C-31, C-32 |            | N-6<br>(weak) |
| <b>29</b>       | 131.81, C               | -                 |                        |            |               |
| <b>30</b>       | 158.08, C               | -                 |                        |            |               |
| <b>31</b>       | 117.94, CH              | 7.75 (s)          | C-29, C-30, C-32, C-33 |            | N-7           |
| <b>32</b>       | 148.18, C               | -                 |                        |            |               |
| <b>33</b>       | 161.61, C               | -                 |                        |            |               |
| <b>34</b>       | 119.27, CH              | 7.92 (s)          | C-32, C-33, C-35, C-36 |            | N-8           |
| <b>35</b>       | 142.51, C               | -                 |                        |            |               |
| <b>36</b>       | 153.94, C               | -                 |                        |            |               |
| <b>N-1</b>      | -                       | -                 |                        | 255.06, N  |               |
| <b>N-2</b>      | -                       | 8.52 (d, 9.7)     | C-9, C-10, C-11        | 110.74, NH | N-1           |
| <b>N-3</b>      | -                       | 7.75 (br. d, 6.9) | C-15, C-16, C-17       | 113.66, NH |               |
| <b>N-4</b>      | -                       | 7.20 (br.)        | C-21                   | 99.93, NH  |               |
| <b>N-5</b>      | -                       | -                 |                        | 245.13, N  |               |
| <b>N-6</b>      | -                       | -                 |                        | 252.43, N  |               |
| <b>N-7</b>      | -                       | -                 |                        | 313.78, N  |               |
| <b>N-8</b>      | -                       | -                 |                        | 314.53, N  |               |

<sup>[a]</sup> Recorded at 176 MHz in CDCl<sub>3</sub>. <sup>[b]</sup> Recorded at 700 MHz in CDCl<sub>3</sub>. <sup>[c]</sup> Recorded at 76 MHz in CDCl<sub>3</sub>.

Table S3. Predicted functions of *czl* gene products.

| <b>Czl Proteins<br/>(# aa)</b> | <b>Annotation /<br/>Predicted Function</b>    | <b>Accession</b>                        | <b>Homologs<br/>(% aa ID)</b>                                                                                                             | <b>Accession</b>                               |
|--------------------------------|-----------------------------------------------|-----------------------------------------|-------------------------------------------------------------------------------------------------------------------------------------------|------------------------------------------------|
| <b>CzII</b><br>(322)           | Fe/2OG dependent precursor peptide oxygenase* | KUM76188                                | Yml, (71)<br><br>S. viridochromogenes hypothetical protein (96)                                                                           | AFJ68073<br><br>ELS57320.1                     |
| <b>CzIA</b><br>(44)            | Precursor peptide                             | WP_107116988                            | YmA, (86)                                                                                                                                 | AFJ68074                                       |
| <b>CzID</b><br>(470)           | YcaO family cyclodehydratase*                 | WP_159042661                            | YmD, (74)<br>McmD1 (31)<br>McmD2 (29)<br>TIsQ (36)                                                                                        | AFJ68075<br>UBK24771<br>UBK24772.1<br>BBA31819 |
| <b>CzIE</b><br>(469)           | P450 monooxygenase                            | WP_062148882                            | YmE, (66)<br>McmI, (30)                                                                                                                   | AFJ68076<br>UBK24777                           |
| <b>CzIB1</b><br>(261)          | putative cyclodehydratase                     | WP_062148878                            | YmB1, (85)<br>McmE (37)                                                                                                                   | AFJ68086<br>UBK24773                           |
| <b>CzIC1</b><br>(287)          | unknown                                       | WP_062148875                            | YmC1, (62)<br>McmF (27)                                                                                                                   | AFJ68077<br>UBK24774                           |
| <b>CzIF</b><br>(362)           | unknown                                       | WP_062148872                            | YmF, (69)                                                                                                                                 | AFJ68078                                       |
| <b>CzIBC</b><br>(465)          | E1-like / dehydrogenase fusion*               | WP_062148869                            | YmBC, (67)<br>McmC (40)                                                                                                                   | AFJ68085<br>UBK24770                           |
| <b>CzIJ</b><br>(166)           | unknown                                       | KQ947987<br>(Locus tag:<br>AQI70_14560) | DUF6624 domain containing protein, (99)                                                                                                   | WP_215158549                                   |
| <b>CzIK</b><br>(409)           | serine peptidase                              | WP_062148866                            | <i>Caulobacter vibrioides</i> beta-lactamase family protein, (36)<br><br><i>Bacillus simplex</i> D-alanyl-D-alanine carboxypeptidase (81) | PDB ID: 7UDA<br><br>CEG31961                   |
| <b>CzIR1</b><br>(138)          | AraC family transcriptional regulator         | WP_062148863                            | YmR1 (66)                                                                                                                                 | AFJ68079                                       |

\*Functions established in this work through in vitro reactions.

**Table S4.** Bacterial strains and plasmids

| Strain or Plasmid                                     | Description                                                                                                                                                                                                    | Reference or Source             |
|-------------------------------------------------------|----------------------------------------------------------------------------------------------------------------------------------------------------------------------------------------------------------------|---------------------------------|
| <b>Streptomyces</b>                                   |                                                                                                                                                                                                                |                                 |
| <i>S. curaco</i> i / pTESa- <i>bldA</i>               | <i>Streptomyces curaco</i> i DSM40107 carrying the integrative plasmid pTESa- <i>bldA</i> , Apr <sup>R</sup> , curacozole producer.                                                                            | Ref <sup>1</sup> and this work. |
| <i>S. curaco</i> i - <i>bldA</i>                      | <i>S. curaco</i> i with <i>bldA</i> sequence under control of <i>ermE</i> * promoter. Derived from <i>S. curaco</i> i / pTESa- <i>bldA</i> after excision of apramycin resistance gene, curacozole producer.   | This work.                      |
| <i>S. curaco</i> i – <i>bldA</i> Δ <i>czlB1::apra</i> | Mutant strain with <i>czlB1</i> sequence replaced with an apramycin resistance gene.                                                                                                                           | This work.                      |
| <i>S. curaco</i> i – <i>bldA</i> Δ <i>czlE::apra</i>  | Mutant strain with <i>czlE</i> sequence replaced with an apramycin resistance gene.                                                                                                                            | This work.                      |
| <i>S. coelicolor</i> CH999                            | Heterologous host lacking actinorhodin BGC.                                                                                                                                                                    | Ref <sup>2</sup>                |
| <i>S. lividans</i> ΔYA9                               | Heterologous host lacking nine endogenous BGCs.                                                                                                                                                                | Ref <sup>3</sup>                |
| <b>E. coli</b>                                        |                                                                                                                                                                                                                |                                 |
| <i>E. coli</i> ET12567 / pUZ8002                      | Methylation deficient ET12567 strain (Cm <sup>R</sup> ) for intergeneric conjugation. Plasmid pUZ8002 carries conjugation functions (Kan <sup>R</sup> )                                                        | Ref <sup>4</sup>                |
| <i>E. coli</i> BW25113 / pJ790                        | Strain for λ-RED based recombination                                                                                                                                                                           | Ref <sup>5</sup>                |
| <b>Plasmids</b>                                       |                                                                                                                                                                                                                |                                 |
| pBSK                                                  | Subcloning plasmid derived from pBluescript II.                                                                                                                                                                |                                 |
| pTESa                                                 | Integrative plasmid, pSET152 derivative, carrying an <i>ermE</i> * promoter, ϕC31 <i>int</i> and <i>att</i> functions, and apramycin resistance gene for selection in <i>E. coli</i> and <i>Streptomyces</i> . | Ref <sup>6</sup>                |
| pKCLP2                                                | Replicative plasmid in <i>E. coli</i> , non-replicative in streptomyces, Hyg <sup>R</sup> .                                                                                                                    | Ref <sup>7</sup>                |
| pKGLP2                                                | <i>gusA</i> containing derivative of pKCLP2, replicative plasmid in <i>E. coli</i> , non-replicative in streptomyces, Hyg <sup>R</sup>                                                                         | Ref <sup>7</sup>                |
| pALCRE                                                | Replicative plasmid in streptomyces, <i>creE</i> under control of <i>tipA</i> promoter, Hyg <sup>R</sup>                                                                                                       | Ref <sup>6</sup>                |
| pLERE                                                 | Template for amplification of apramycin resistance gene                                                                                                                                                        | Ref <sup>6</sup>                |
| pCDFDuet_1                                            | Template for amplification of spectinomycin resistance gene                                                                                                                                                    | Novagen                         |
| pBSK- <i>czl</i>                                      | Subcloning plasmid containing <i>czl</i> BGC                                                                                                                                                                   | This work.                      |
| pTESa- <i>czl</i>                                     | Integrative plasmid containing curacozole ( <i>czl</i> ) BGC from <i>czlI</i> to <i>czlK</i>                                                                                                                   | This work.                      |
| pTESa- <i>czl</i> ΔI                                  | Integrative plasmid containing <i>czl</i> BGC with <i>czlI</i> deleted.                                                                                                                                        | This work.                      |
| pTESa- <i>czl</i> ΔD                                  | Integrative plasmid containing <i>czl</i> BGC with <i>czlD</i> deleted.                                                                                                                                        | This work.                      |
| pTESa- <i>czl</i> ΔC1                                 | Integrative plasmid containing <i>czl</i> BGC with <i>czlC1</i> deleted.                                                                                                                                       | This work.                      |
| pTESa- <i>czl</i> ΔF                                  | Integrative plasmid containing <i>czl</i> BGC with <i>czlF</i> deleted.                                                                                                                                        | This work.                      |
| pTESa- <i>czl</i> ΔBC                                 | Integrative plasmid containing <i>czl</i> BGC with <i>czlBC</i> deleted.                                                                                                                                       | This work.                      |
| pTESa- <i>czl</i> ΔJK                                 | Integrative plasmid containing <i>czl</i> BGC with <i>czlJ</i> and <i>czlK</i> deleted.                                                                                                                        | This work.                      |
| pKGLP2- <i>czlE::apra</i>                             | Suicide plasmid containing <i>czl</i> BGC with <i>czlE</i> replaced by apramycin resistance gene                                                                                                               | This work.                      |
| pKCLP2- <i>czlB1::apra</i>                            | Suicide plasmid containing <i>czl</i> BGC with <i>czlB1</i> replaced by apramycin resistance gene                                                                                                              | This work.                      |



Table S5. Primers for curacozole BGC cloning and mutagenesis

| Primer         | Sequence (5'-3')*                                                                         | Notes                                                                                     |
|----------------|-------------------------------------------------------------------------------------------|-------------------------------------------------------------------------------------------|
| cur_xbalfw     | ACG <u>TCTAGA</u> GGTGGGTTGCCTCTGGATG                                                     | pTESa-cz/ generation, Xbal site underlined                                                |
| cur_EcoRIrv    | GGC <u>GAATTC</u> TCAGTCGTCGATCGCCTGGTAG                                                  | pTESa-cz/ generation, EcoRI site underlined                                               |
| czIdell_fwxbal | AAAAAT <u>TCTAGA</u> CCGGAGAAATCCCCCGGTCC                                                 | pTESa-cz/ΔI generation, Xbal site underlined                                              |
| cur2           | TCAGTCGTCGATGCGCTGGTAG                                                                    | pTESa-cz/ΔI generation                                                                    |
| cur_xbald_fw   | ACG <u>TCTAGA</u> GGTGGGTTGCCTCTGGATG                                                     | pTESa-cz/ΔJK generation, Xbal site underlined                                             |
| czIdelJ_v      | GCACCTCGGCGAGCGGCGATAATG                                                                  | pTESa-cz/ΔJK generation                                                                   |
| sect_czID_fw   | GGTAATTCTCCGGCACACCACCGCACCCA<br>TGAATGGAGTCCCGC <u>ACTAGT</u> ttatttgccgac<br>taccttg    | czID deletion, amplification of <i>aadA</i> for Spec <sup>R</sup> , SpeI site underlined  |
| spect_czID_rv  | GGGCCGGTTCGTGGTCAGGGCAGGGGGT<br>GCGGGCCTGGTACGTAG <u>ACTAGT</u> ttgtttattttt<br>ctaaataca | czID deletion, amplification of <i>aadA</i> for Spec <sup>R</sup> , SpeI site underlined  |
| spec_czIC1_fw  | GGTGGCCCCATGGGCGGACCGCGCGGA<br>GCGACGGCATGAGC <u>ACTAGT</u> gaccgagtgagct<br>agcta        | cz/C1 deletion, amplification of <i>aadA</i> for Spec <sup>R</sup> , SpeI site underlined |
| spec_czIC1_rv  | CTCCAGGCCGCGCAGCTCGGCGAGGTGC<br>CCCACGTCGGTCATCCC <u>ACTAGT</u> ttatttgccga<br>ctacctt    | czIC1 deletion, amplification of <i>aadA</i> for Spec <sup>R</sup> , SpeI site underlined |
| spect_czIF_fw  | CTGCTGGAGTCGGCGCGGCACTCGACGG<br>CGGCGGCACGGGGATGA <u>ACTAGT</u> ttatttgccg<br>actacctt    | cz/F deletion, amplification of <i>aadA</i> for Spec <sup>R</sup> , SpeI site underlined  |
| spect_czIF_rv  | CCAGCGGGTCAAGCCGACGAGGGTGTA<br>CGAGGCGGTGGTCATA <u>ACTAGT</u> ttgtttattttct<br>aaatac     | cz/F deletion, amplification of <i>aadA</i> for Spec <sup>R</sup> , SpeI site underlined  |
| spect_czIBC_fw | CGACGCGTACGCCCGGCACATCCACCGCA<br>CCGCCCGGAGGCCGT <u>ACTAGT</u> ttatttgccga<br>ctaccttg    | cz/BC deletion, amplification of <i>aadA</i> for Spec <sup>R</sup> , SpeI site underlined |
| spect_czIBC_rv | GGGGAACGGTGACAGGCACCTCGGCGAG<br>CGGCGATAATGGAT <u>ACTAGT</u> ttgtttattttctaaat<br>aca     | cz/BC deletion, amplification of <i>aadA</i> for Spec <sup>R</sup> , SpeI site underlined |
| apra_czIB1_fw  | GGCGACCCCCAGGCAACCGGAACCGGCC<br>GGACACCGAAAGGAATCACGATGAGgcatat<br>ggatatctctagataccg     | cz/B1 deletion, amplification of <i>aac(3)/IV</i> for Apra <sup>R</sup>                   |
| apra_czIB1_rv  | AGTGCAGCGCCGTGGCCGCCGCTGCCG<br>GTCGTGCCCGGCGGGTGCCTCATGCCata<br>tgaacaaaagctggagctc       | cz/B1 deletion, amplification of <i>aac(3)/IV</i> for Apra <sup>R</sup>                   |
| czIB1-fw       | GTGTGCTTTCCCTACCTCCGGTC                                                                   | cz/B1 deletion, amplification of <i>cz/B1::apra</i> sequence                              |
| czIB1-rv       | GTCGAGTCGGAAGCCGTCCGG                                                                     | cz/B1 deletion, amplification of <i>cz/B1::apra</i> sequence                              |

|                      |                                                                                       |                                                                                                                                       |
|----------------------|---------------------------------------------------------------------------------------|---------------------------------------------------------------------------------------------------------------------------------------|
| <b>apra_czIE_fw</b>  | ACGCCCGCCCCGACCGCGCCCTGCCGTG<br>ACCGACGCCCGAGGTGCCCGCGATgcatat<br>ggatatctctagataaccg | <i>czIE</i> deletion, amplification of<br><i>aac(3)IV</i> for Apra <sup>R</sup>                                                       |
| <b>apra_czIE_rv</b>  | ACTCCTCCTTGCGCATCAGCCCCGCGACC<br>AGCGCGGTTCGTCGCATGCCTCATCGcatatg<br>aacaagctggagctc  | <i>czIE</i> deletion, amplification of<br><i>aac(3)IV</i> for Apra <sup>R</sup>                                                       |
| <b>czIE-fw</b>       | GTGGTGGTTCGTCAGGTCAGCG                                                                | <i>czIE</i> deletion, amplification of<br><i>czIE::apra</i> sequence                                                                  |
| <b>czIE-rv</b>       | TGAAGCCGTTGAGACGCGCCAG                                                                | <i>czIE</i> deletion, amplification of<br><i>czIE::apra</i> sequence                                                                  |
| <b>FW_fw1</b>        | TGGATCATCGGGTCGACCTGCTGT                                                              | <i>czIA</i> F18W mutation, for<br>amplification from pBSK- <i>czIA</i>                                                                |
| <b>FW_rv1</b>        | TCCGACCTCGATGTCGACTTC                                                                 | <i>czIA</i> F18W mutation, for<br>amplification from pBSK- <i>czIA</i>                                                                |
| <b>CzIA-F18Y-fw</b>  | TACATCATCGGGTCGACCTGCTGTTC                                                            | <i>czIA</i> F18Y mutation, for<br>amplification from pBSK- <i>czIA</i>                                                                |
| <b>CzIA-F18Y-rv</b>  | TCCGACCTCGATGTCGACTTCCTC                                                              | <i>czIA</i> F18Y mutation, for<br>amplification from pBSK- <i>czIA</i>                                                                |
| <b>coreI_V_fw_b</b>  | GGTCGGATTCATCGTCGGGTCGAC                                                              | <i>czIA</i> _I20V mutation, for<br>amplification from pBSK- <i>czIA</i>                                                               |
| <b>coreI_V_rv_b</b>  | TCGATGTCGACTTCCTCGATC                                                                 | <i>czIA</i> _I20V mutation, for<br>amplification from pBSK- <i>czIA</i>                                                               |
| <b>coreIL2fw</b>     | GGATTCATCCTCGGGTCGACCTGC                                                              | <i>czIA</i> _I20L mutation, for<br>amplification from pBSK- <i>czIA</i>                                                               |
| <b>coreIL2rv</b>     | GACCTCGATGTCGACTTCCTC                                                                 | <i>czIA</i> _I20L mutation, for<br>amplification from pBSK- <i>czIA</i>                                                               |
| <b>czIAT_Sfw_JT</b>  | ATCGGGTCGTCCTGCTGTTCCCTG                                                              | <i>czIA</i> _T23S mutation, for<br>amplification from pBSK- <i>czIA</i>                                                               |
| <b>coreC_S_fw_a</b>  | ATCGGGTCGTCCTCCTGTTCCCTG                                                              | <i>czIA</i> _T23S_C24S mutation, for<br>amplification from pBSK-<br><i>czIA</i> _T23S                                                 |
| <b>czIAT_Srv_JT</b>  | GATGAATCCGACCTCGATGTC                                                                 | <i>czIA</i> _T23S and<br><i>czIA</i> _T23S_C24S mutations,<br>for amplification from pBSK-<br><i>czIA</i> and pBSK- <i>czIA</i> _T23S |
| <b>CzIA_check_fw</b> | GTTTCGCGCCCGCGGATCT                                                                   | Primer to amplify <i>czIA</i> for DNA<br>sequencing                                                                                   |
| <b>CzIA_check_rv</b> | CCGCCGCACTTGGTGTACCG                                                                  | Primer to amplify <i>czIA</i> for DNA<br>sequencing                                                                                   |

\*Upper case corresponds to *czI* sequences (with exception of restriction enzyme sites), lower case to antibiotic resistance gene sequences. Restriction enzyme sites are underlined and in bold.

Table S6. Buffers used for purification of cz/ specified proteins.

| <b>Protein</b>               | <b>Buffer A</b>                                                  | <b>Buffer B</b>                                                                      | <b>Storage Buffer</b>                                               |
|------------------------------|------------------------------------------------------------------|--------------------------------------------------------------------------------------|---------------------------------------------------------------------|
| <b>CzIA<br/>and variants</b> | pH 7.5<br>25 mM Bis-Tris<br>100 mM NaCl<br>1 mM DTT              | pH 7.5<br>25 mM Bis-Tris<br>100 mM NaCl<br>1 mM DTT<br>500 mM imidazole              | pH 7.5<br>25 mM Bis-Tris<br>50 mM NaCl<br>1 mM DTT<br>10 % glycerol |
| <b>CzID<br/>CzIBC</b>        | pH 7.5<br>40 mM Tris<br>100 mM NaCl<br>1 mM DTT<br>10% glycerol  | pH 7.5<br>40 mM Tris<br>100 mM NaCl<br>1 mM DTT<br>10 % glycerol<br>500 mM imidazole | pH 7.5<br>40 mM Tris<br>50 mM NaCl<br>1 mM DTT<br>10 % glycerol     |
| <b>CzII</b>                  | pH 8.0<br>40 mM Tris<br>100 mM NaCl<br>10 % glycerol<br>1 mM DTT | pH 8.0<br>40 mM Tris<br>100 mM NaCl<br>10 % glycerol<br>1 mM DTT<br>500 mM imidazole | pH 8.0<br>40 mM Tris<br>50 mM NaCl<br>10 % glycerol                 |

Table S7. Sequences of CzIA and variants used for in vitro assays

| Variant                                                                                                                                                                                                                                                                                                                                                                                                                                                                                                                                                                           | Sequence*                                                                                                                                    | Av. Calculated Mass (Da)** |
|-----------------------------------------------------------------------------------------------------------------------------------------------------------------------------------------------------------------------------------------------------------------------------------------------------------------------------------------------------------------------------------------------------------------------------------------------------------------------------------------------------------------------------------------------------------------------------------|----------------------------------------------------------------------------------------------------------------------------------------------|----------------------------|
| CzIA                                                                                                                                                                                                                                                                                                                                                                                                                                                                                                                                                                              | GSSHHHHHHSSGLVPRGSQ <b>MFENTTAEIEEVDIEVG</b><br><b>FIIGSTCC</b> <u>SLEMEEDDLLVAAE</u> <b>ETEAV</b>                                           | 6851.36                    |
| CzIA C24S                                                                                                                                                                                                                                                                                                                                                                                                                                                                                                                                                                         | GSSHHHHHHSSGLVPRGSHMASMTGGQQMGRGSM <b>FE</b><br><b>NTTAEIEEVDIEVGF</b> <b>FIIGST</b> <b>S</b> <b>SLEMEEDDLLVAAE</b><br><b>ETEAV</b>          | 8224.89***                 |
| CzIA C25S                                                                                                                                                                                                                                                                                                                                                                                                                                                                                                                                                                         | GSSHHHHHHSSGLVPRGSHMASMTGGQQMGRGSM <b>FE</b><br><b>NTTAEIEEVDIEVGF</b> <b>FIIGST</b> <b>C</b> <b>S</b> <b>SLEMEEDDLLVAAE</b><br><b>ETEAV</b> | 8224.89***                 |
| CzIA C24S/C25S                                                                                                                                                                                                                                                                                                                                                                                                                                                                                                                                                                    | GSSHHHHHHSSGLVPRGSHMASMTGGQQMGRGSM <b>FE</b><br><b>NTTAEIEEVDIEVGF</b> <b>FIIGST</b> <b>S</b> <b>S</b> <b>SLEMEEDDLLVAAE</b><br><b>ETEAV</b> | 8208.83***                 |
| CzIA F18G                                                                                                                                                                                                                                                                                                                                                                                                                                                                                                                                                                         | GSSHHHHHHSSGLVPRGSH <b>MFENTTAEIEEVDIEVG</b><br><b>G</b> <b>IIGSTCC</b> <b>SLEMEEDDLLVAAE</b> <b>ETEAV</b>                                   | 6770.25                    |
| <p>*Expressed sequences shown as missing <i>N</i>-terminal Met due to action of methionine aminopeptidase in <i>E. coli</i>. Native CzIA sequence shown in bold, core peptide in blue, substitutions in red. The underlined sequence in CzIA is predicted by AlphaFold to form <math>\beta</math>-sheets with the peptide binding domain of CzIBC.</p> <p>**Calculations performed using ExPASy PeptideMass.</p> <p>***Masses of these CzIA variants are significantly larger due to differences in the N-terminal sequences arising from cloning of the corresponding genes.</p> |                                                                                                                                              |                            |

Table S8. Calculated  $m/z$  values for CzIA and variants before and after heterocyclization by CzID and CzIBC.

| <b>z</b> | <b>Calculated*</b>                                    | <b>Observed</b> | <b>z</b> | <b>Calculated*</b>                                                                   | <b>Observed</b> |
|----------|-------------------------------------------------------|-----------------|----------|--------------------------------------------------------------------------------------|-----------------|
|          | <b>CzIA</b><br>MW <sub>calc</sub> = 6851.36 Da        |                 |          | <b>CzIA-Ox</b><br>(-H <sub>2</sub> O, -2H)<br>MW <sub>calc</sub> = 6831.36 Da        |                 |
| 4        | 1713.84                                               | 1714.30         | 4        | 1708.84                                                                              | 1709.1          |
| 5        | 1371.27                                               | 1371.53         | 5        | 1367.07                                                                              | 1367.53         |
| 6        | 1142.89                                               | 1142.92         | 6        | 1139.56                                                                              | 1139.71         |
| 7        | 979.77                                                | 980.02          | 7        | 976.94                                                                               | 977.01          |
|          |                                                       |                 |          |                                                                                      |                 |
|          | <b>ClzA C24S</b><br>MW <sub>calc</sub> = 8224.89 Da   |                 |          | <b>ClzA C24S-Ox</b><br>(-H <sub>2</sub> O, -2H)<br>MW <sub>calc</sub> = 8204.89 Da   |                 |
| 5        | 1645.98                                               | 1645.65         | 5        | 1641.98                                                                              | 1642.25         |
| 6        | 1371.82                                               | 1371.17         | 6        | 1368.48                                                                              | 1638.97         |
| 7        | 1175.98                                               | 1175.73         | 7        | 1173.13                                                                              | 1173.43         |
| 8        | 1029.11                                               | 1029.10         | 8        | 1026.6                                                                               | 1026.60         |
|          |                                                       |                 |          |                                                                                      |                 |
|          | <b>CzIA C25S</b><br>MW <sub>calc</sub> = 8224.89 Da   |                 |          | <b>CzIA C25S-Ox</b><br>(-H <sub>2</sub> O, -2H)<br>MW <sub>calc</sub> = 8204.89      |                 |
| 5        | 1645.98                                               | 1645.25         | 5        | 1641.98                                                                              | 1642.35         |
| 6        | 1371.82                                               | 1371.67         | 6        | 1368.48                                                                              | 1368.67         |
| 7        | 1175.98                                               | 1175.93         | 7        | 1173.13                                                                              | -               |
| 8        | 1029.11                                               | 1028.7          | 8        | 1026.6                                                                               | -               |
|          |                                                       |                 |          |                                                                                      |                 |
|          | <b>CzIA C24S/C25S</b><br>MW <sub>calc</sub> = 8208.83 |                 |          | <b>CzIA C24S/C25S-Ox</b><br>(-H <sub>2</sub> O, -2H)<br>MW <sub>calc</sub> = 8188.83 |                 |
| 5        | 1642.77                                               | 1642.35         | 5        | 1638.77                                                                              | 1638.25         |
| 6        | 1369.14                                               | 1368.67         | 6        | 1365.81                                                                              | 1366.27         |
| 7        | 1173.69                                               | 1173.43         | 7        | 1170.83                                                                              | -               |
| 8        | 1027.10                                               | 1027.1          | 8        | 1024.60                                                                              | 1024.50         |

\*Average calculated masses based on CzIA sequences missing *N*-terminal Met. Ox = oxazole.

Table S9. Calculated  $m/z$  values for CzIA before and after hydroxylation by CzII.

| <b><i>z</i></b>                                                                   | <b><i>Calculated*</i></b>                      | <b><i>Observed</i></b> | <b><i>z</i></b> | <b><i>Calculated*</i></b>                         | <b><i>Observed</i></b> |
|-----------------------------------------------------------------------------------|------------------------------------------------|------------------------|-----------------|---------------------------------------------------|------------------------|
|                                                                                   | <b>CzIA</b><br>MW <sub>calc</sub> = 6851.36 Da |                        |                 | <b>CzIA-OH</b><br>MW <sub>calc</sub> = 6867.36 Da |                        |
| 4                                                                                 | 1713.84                                        | 1713.25                | 4               | 1717.84                                           | 1717.89                |
| 5                                                                                 | 1371.27                                        | 1370.65                | 5               | 1374.47                                           | 1373.89                |
| 6                                                                                 | 1142.89                                        | 1142.61                | 6               | 1145.56                                           | 1145.34                |
| 7                                                                                 | 979.77                                         | 979.52                 | 7               | 982.05                                            | 981.72                 |
| *Average calculated masses based on CzIA sequences missing <i>N</i> -terminal Met |                                                |                        |                 |                                                   |                        |

## FIGURES

**Figure S1.** Morphological characteristics of *S. curacoii* in response to constitutive expression of *bldA*.

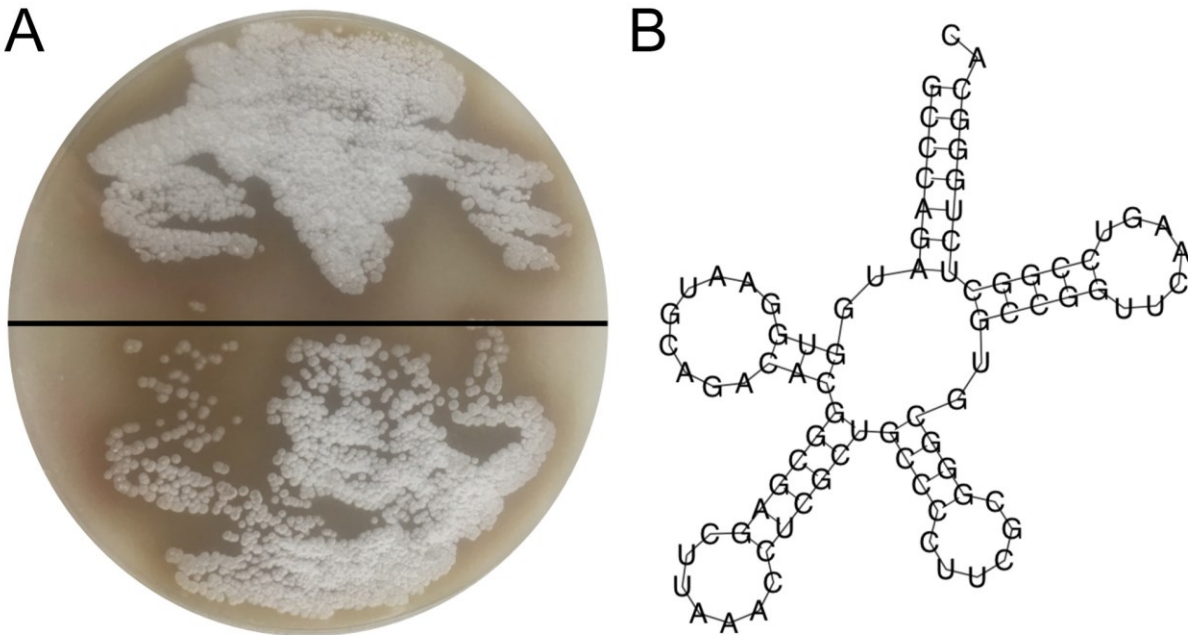

**Figure S1.** Morphological characteristics of *S. curacoii* in response to constitutive expression of *bldA*. **(A)** Growth of *S. curacoii* DSM40107 (top) and *S. curacoii* / pTESa-*bldA* (bottom) on mannitol-soya agar. **(B)** The predicted secondary structure of the native BldA sequence from *S. curacoii*. The secondary structure was predicted with the RNAfold server (<http://rna.tbi.univie.ac.at/cgi-bin/RNAWebSuite/RNAfold.cgi>).

Figure S2. Key NMR correlation data for Curacozole.

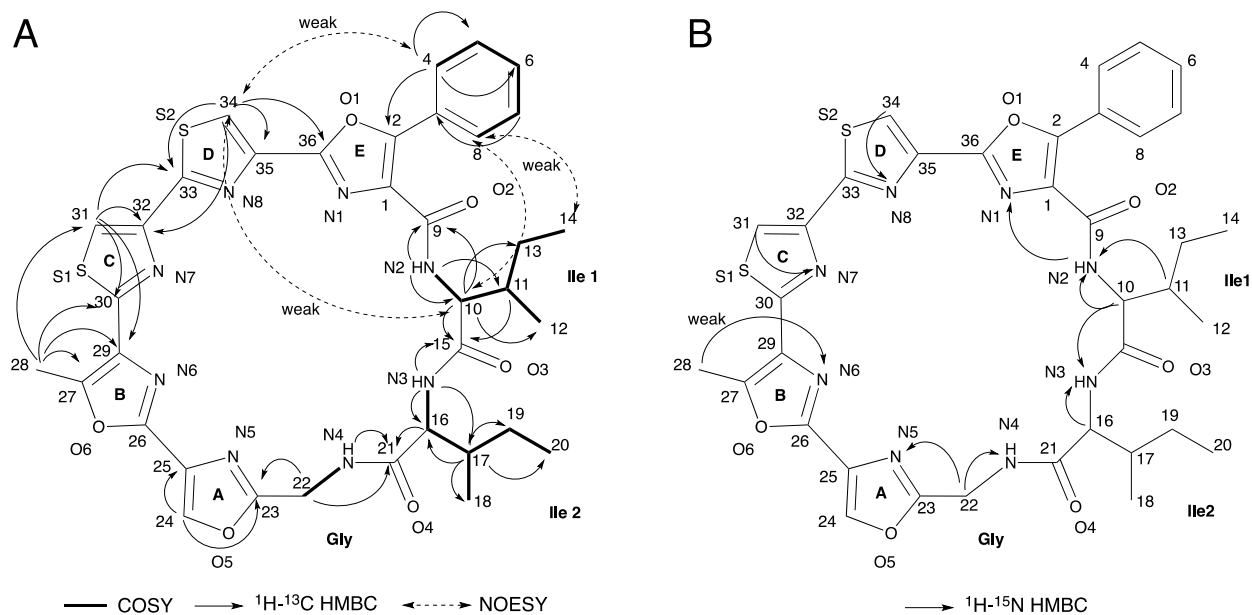

Figure S2. Key NMR correlation data for Curacozole. (A) COSY,  $^1\text{H}$ - $^{13}\text{C}$  HMBC, and NOESY correlations. (B)  $^1\text{H}$ - $^{15}\text{N}$  HMBC correlations.



Figure S3. A composite of MS<sup>2</sup> and MS<sup>3</sup> CID spectra for Curacozole.

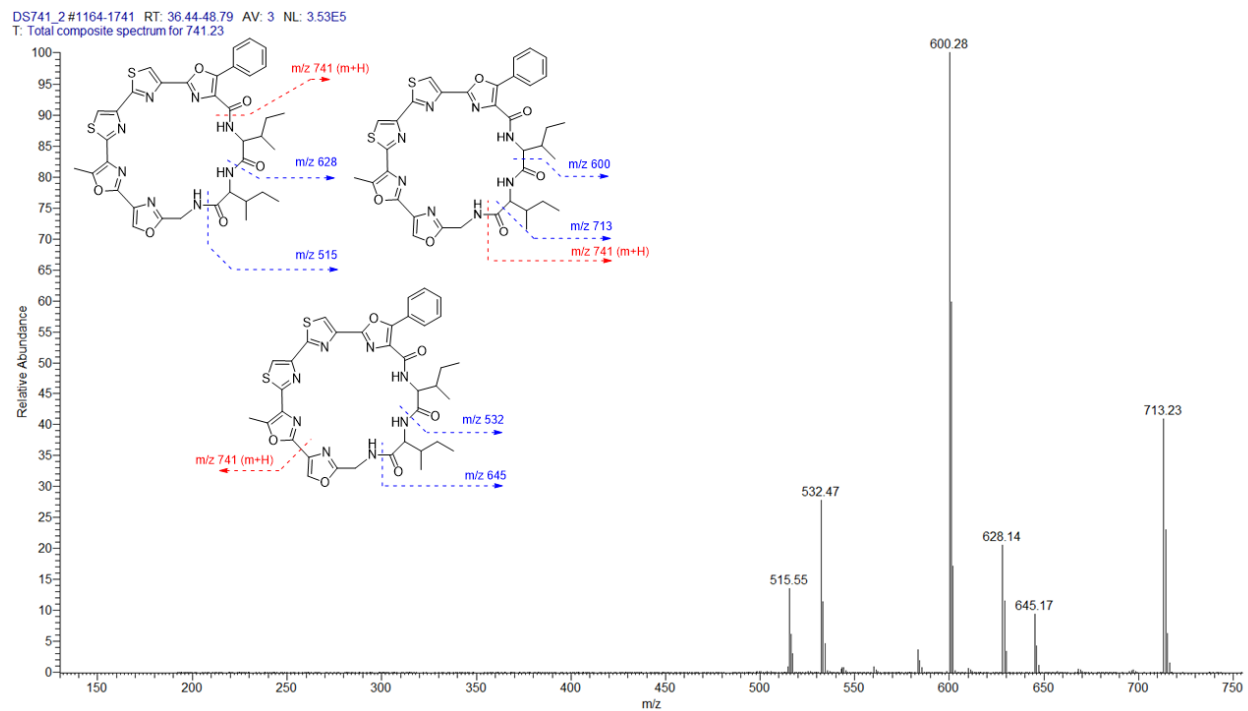

**Figure S3.** A composite of MS<sup>2</sup> and MS<sup>3</sup> CID spectra for Curacozole. The 741 *m/z* molecular ion (red) was subjected to CID fragmentation (MS<sup>2</sup>) and the resulting fragments (blue) were selected for additional (MS<sup>3</sup>) fragmentation.

Figure S4.  $^1\text{H-NMR}$  spectrum of Curacozole (700 MHz,  $\text{CDCl}_3$ )

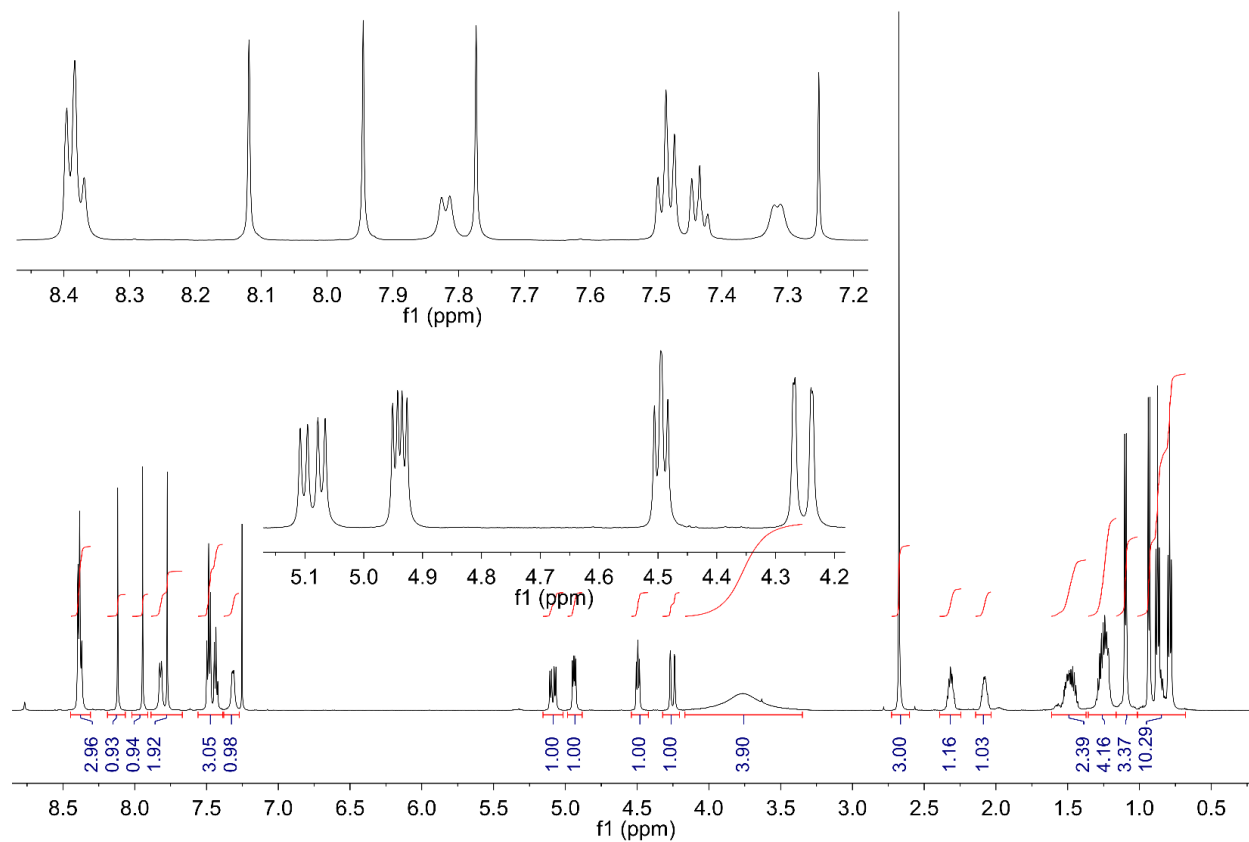

Figure S4.  $^1\text{H-NMR}$  spectrum of Curacozole (700 MHz,  $\text{CDCl}_3$ ). Spectrum continued next page.

**Figure S4 (cont.)**

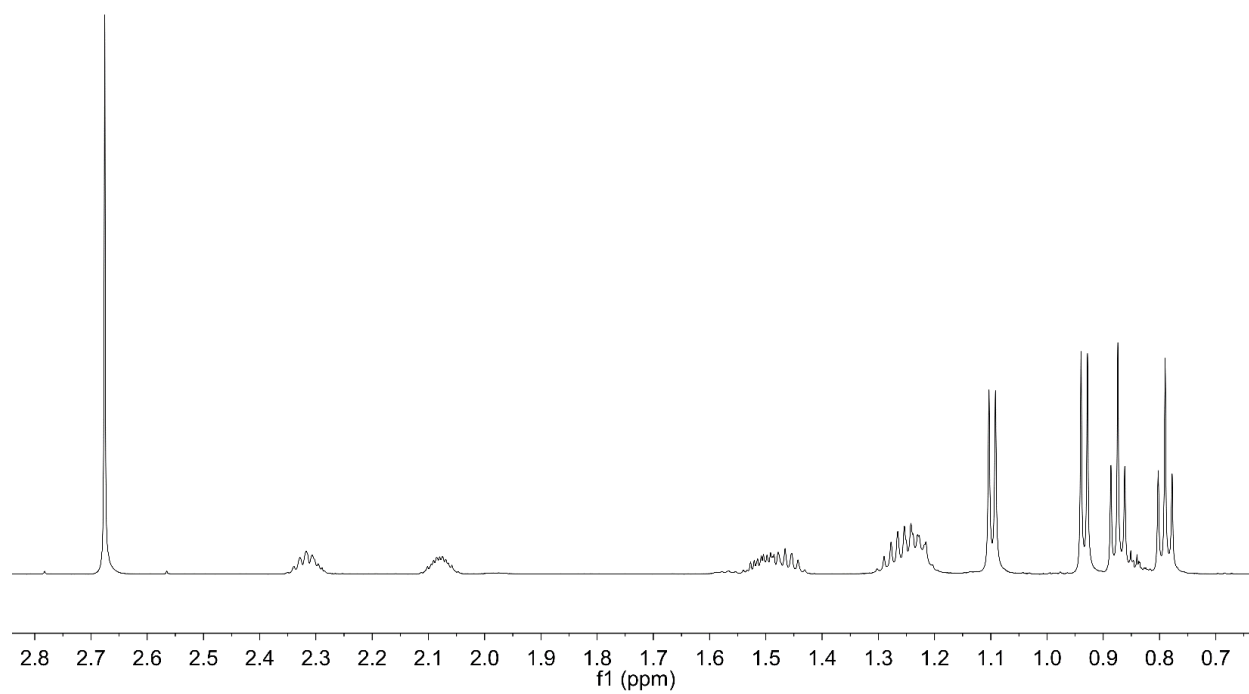

**Figure S4 (cont.)** Expansion of the upfield region of the <sup>1</sup>H-NMR spectrum of Curacozole (700 MHz, CDCl<sub>3</sub>)

Figure S5. SDS-PAGE analysis of purified CzIA and variants.

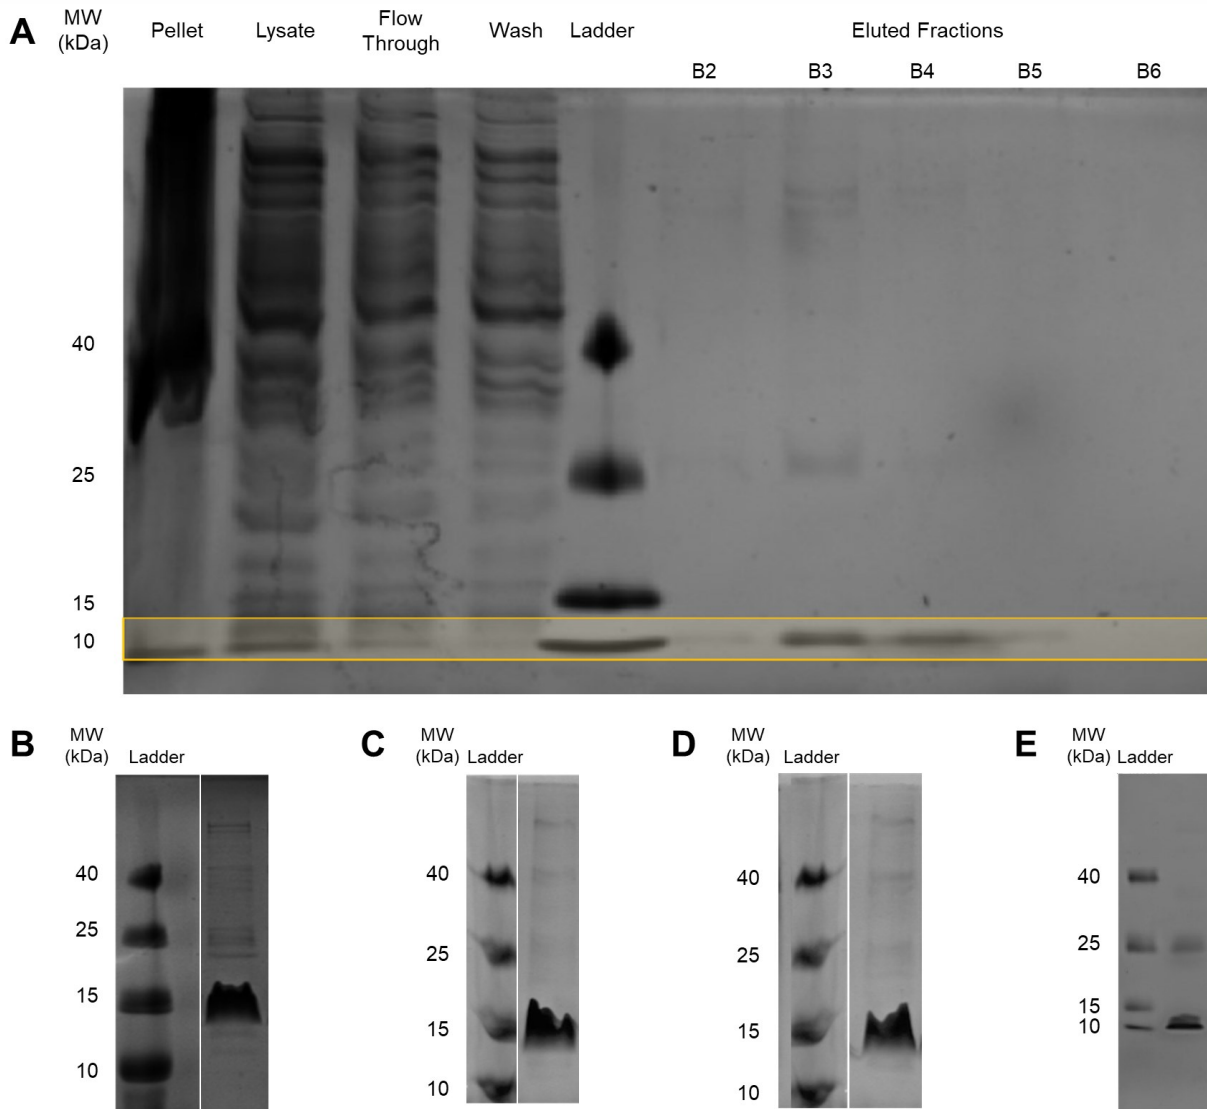

**Figure S5.** SDS-PAGE analysis of purified CzIA and variants. **A)** CzIA purification. Shown are samples of cell pellet and supernatant following cell lysis and centrifugation. Fractions eluted from the Ni-NTA column include flow-through during column loading, column wash, and fractions from the imidazole gradient (B2-B6). Fractions B3 and B4 were collected. **B)** Purified CzIA C24S. **C)** Purified CzIA C25S. **D)** Purified CzIA C24S/C25S. **E)** Purified CzIA F18G.

Figure S6. SDS-PAGE analysis of purified CzID.

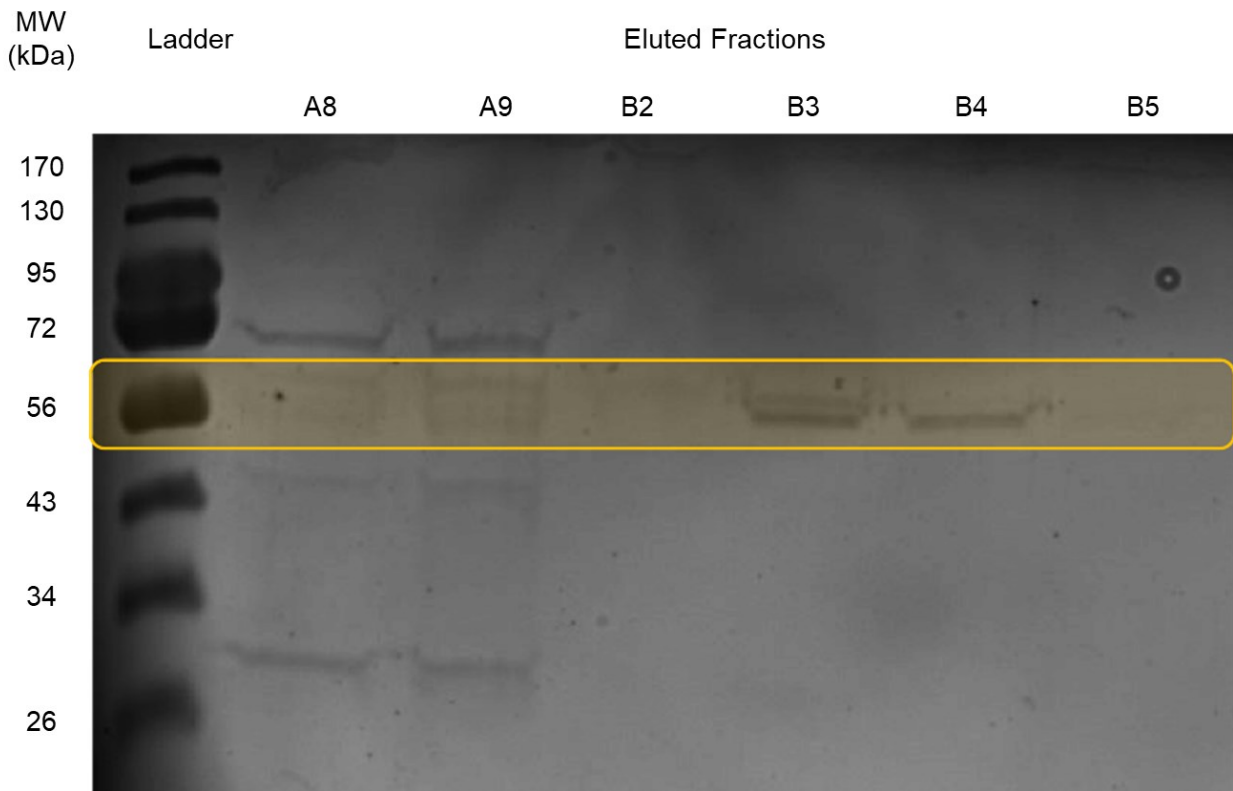

**Figure S6.** SDS-PAGE analysis of CzID purification by Ni-NTA chromatography.

Fractions B3 and B4 were collected. The predicted MW is 54.6 kDa.

Figure S7. SDS-PAGE analysis of purified CzIBC.

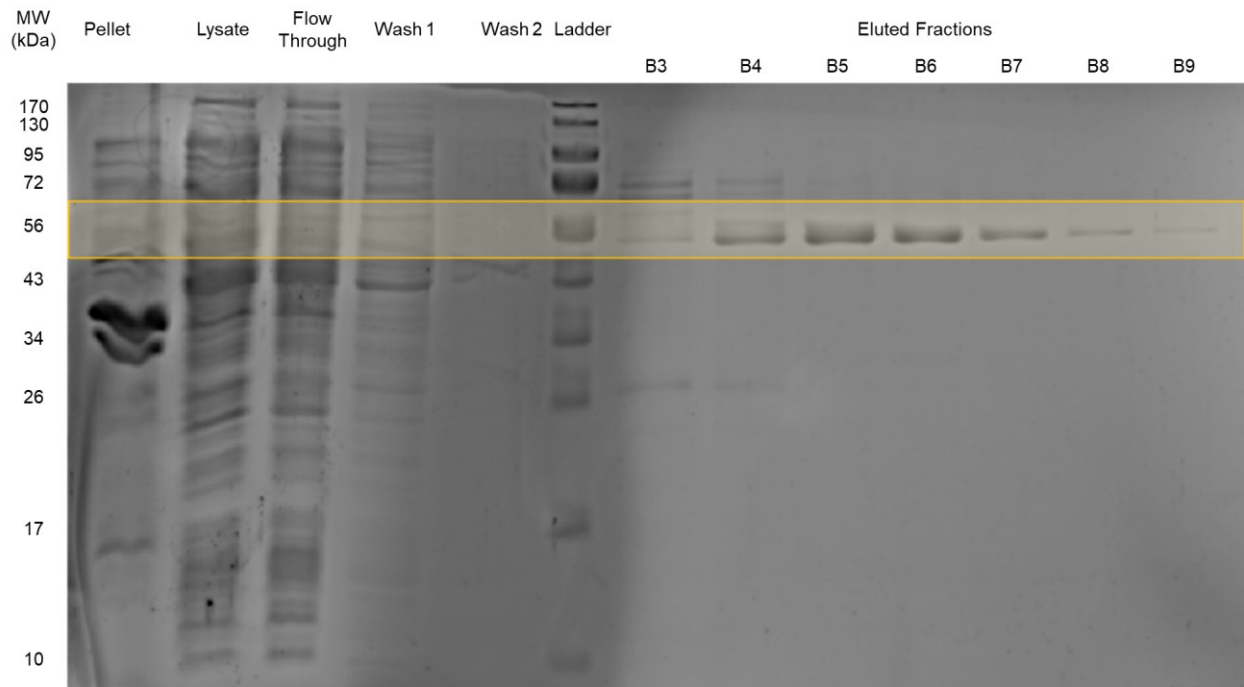

**Figure S7.** SDS-PAGE analysis of CzIBC purification by Ni-NTA chromatography.

Fractions B4-B9 were collected. The predicted MW is 50.8 kDa.

Figure S8. SDS-PAGE analysis of purified CzII.

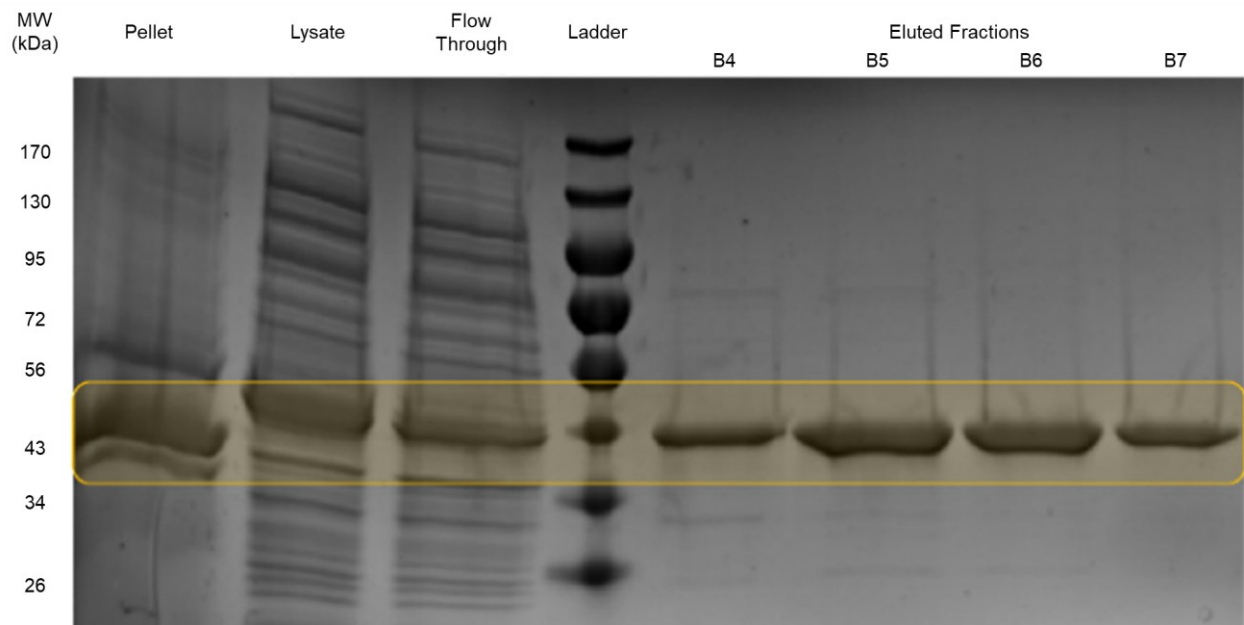

**Figure S8.** SDS-PAGE analysis of CzII purification by Ni-NTA chromatography.

Fractions B4-B7 were collected. The predicted MW is 40.5 kDa.

Figure S9. Supporting structural predictions for CzID and CzIBC AlphaFold models.

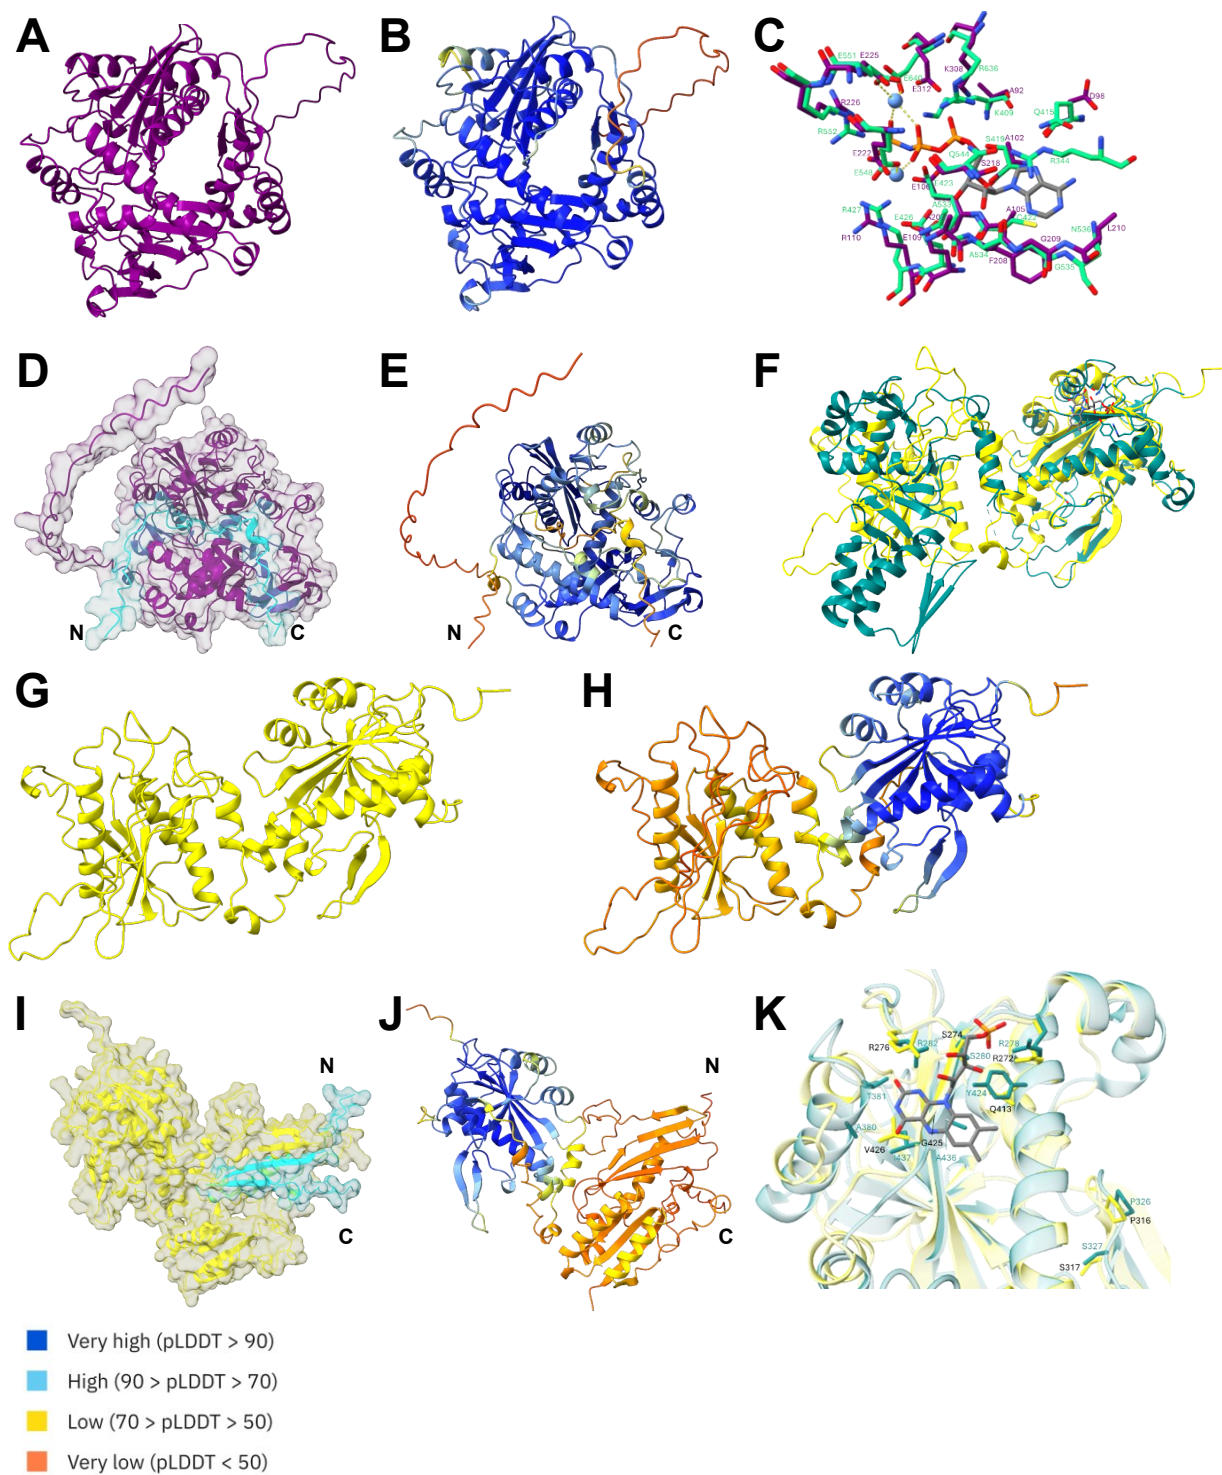

**Figure S9.** Supporting structural predictions for CzID and CzIBC AlphaFold2 models. (A) CzID. (B) CzID coloured by pLDDT scoring. (C) Active site residues of CzID (purple)



identified by overlaying the model with LynD (green).  $Mg^{2+}$  ions are shown as blue spheres and ANP is shown as grey sticks coloured by heteroatom. **(D)** CzIA (cyan) complexed with CzID (purple). **(E)** CzIA complexed with CzID coloured by pLDDT scoring. **(F)** CzIBC (yellow) aligned with ThcOx (PDB ID: 5LQ4; RMSD = 3.8 Å, Z = 28.4). ThcOx (teal) is shown bound to FMN, in grey sticks coloured by heteroatom. **(G)** CzIBC. **(H)** CzIBC coloured by pLDDT scoring. **(I)** CzIA (cyan) complexed with CzIBC (yellow). **(J)** CzIA complexed with CzIBC coloured by pLDDT scoring. **(K)** The FMN-binding residues of CzIBC (yellow) identified by overlaying the model with the known structure of ThcOx (teal). FMN is shown as grey sticks coloured by heteroatom.



Figure S11. Structural predictions for CzID/BC/A heteromeric complexes.

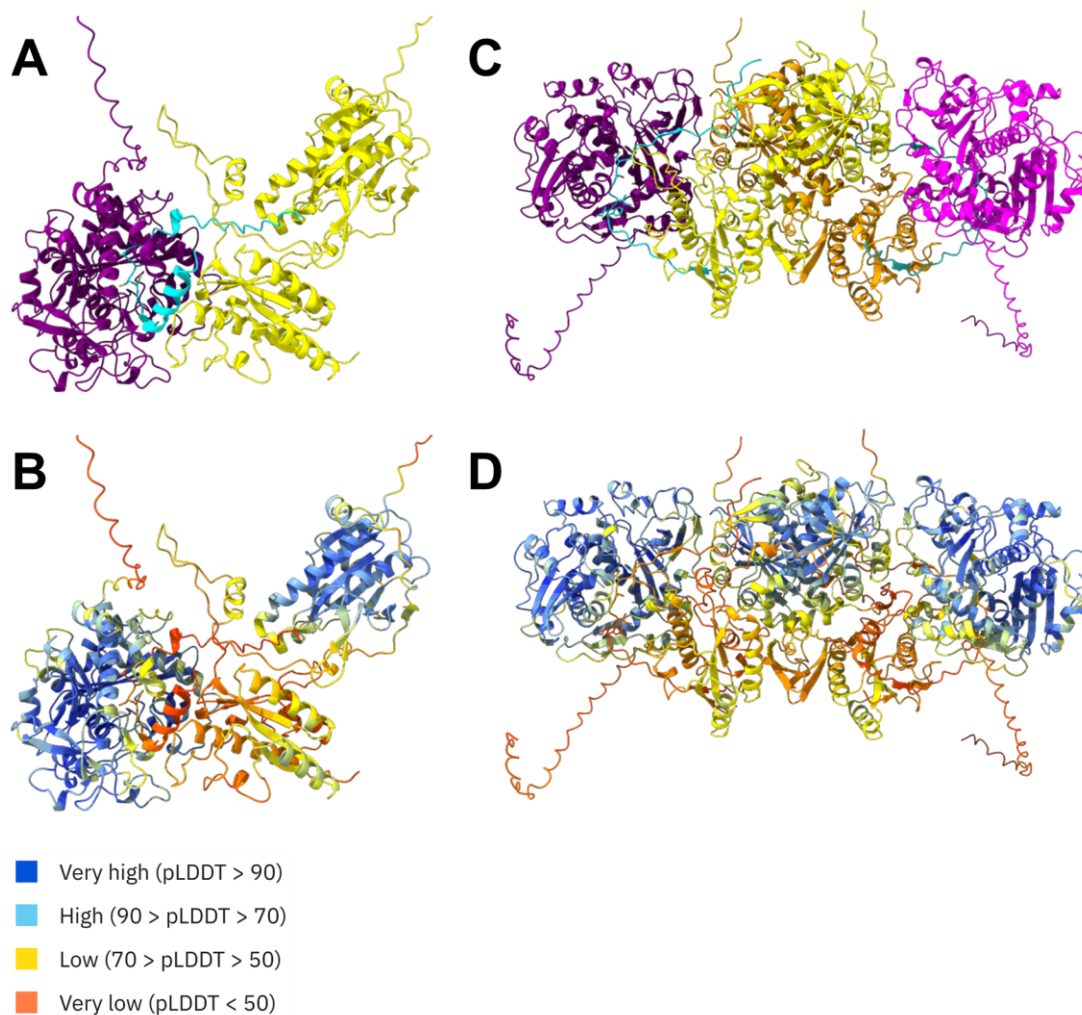

**Figure S11.** Structural predictions for CzID/BC/A heteromers by AlphaFold3. **(A)** CzID/BC/A heterotrimer including CzID (purple), CzIBC (yellow), and CzIA (cyan) with CzIA<sub>22-25</sub> shown as sticks coloured by heteroatom. Confidence scores ipTM = 0.24 and pTM = 0.5. **(B)** CzID/BC/A coloured by pLDDT. **(C)** (CzID/BC/A)<sub>2</sub> heterohexamer model (ipTM = 0.31, pTM = 0.4) of CzID (purple/magenta), CzIBC (yellow/orange), and CzIA (cyan/teal). CzIA S22, T23, C24, and C25 are shown as sticks coloured by heteroatom. **(D)** (CzID/BC/A)<sub>2</sub> coloured by pLDDT.

Figure S12. Structure based sequence alignment of CzIBC and ThcOx (5LQ4-B).

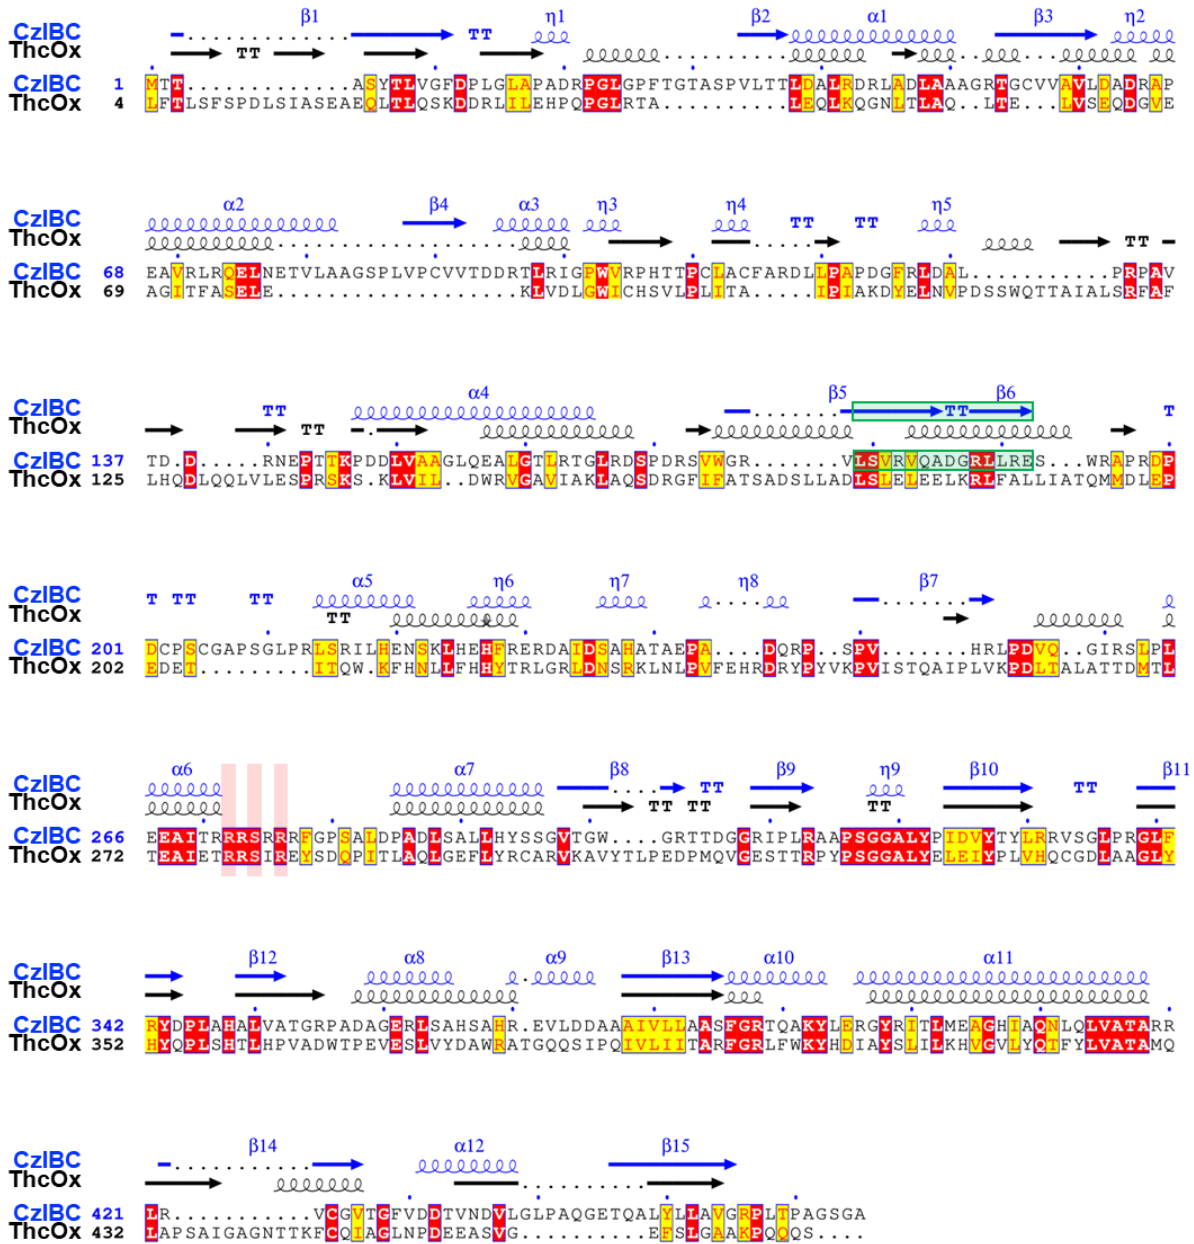

**Figure S12.** Structure based sequence alignment of CzIBC and ThcOx. The AlphaFold model for CzIBC (complexed with CzIA) was aligned to ThcOx (PDB ID: 5LQ4-B) using ENDscript 2.0.<sup>9</sup> The resulting sequence alignment was annotated using ESPrnt 3.0.<sup>9</sup> The predicted peptide-recruiting  $\beta$ -sheet residues are highlighted with green bars. FMN-binding residues are highlighted with red bars.

Figure S13. CzIA is not modified by CzID without CzIBC.

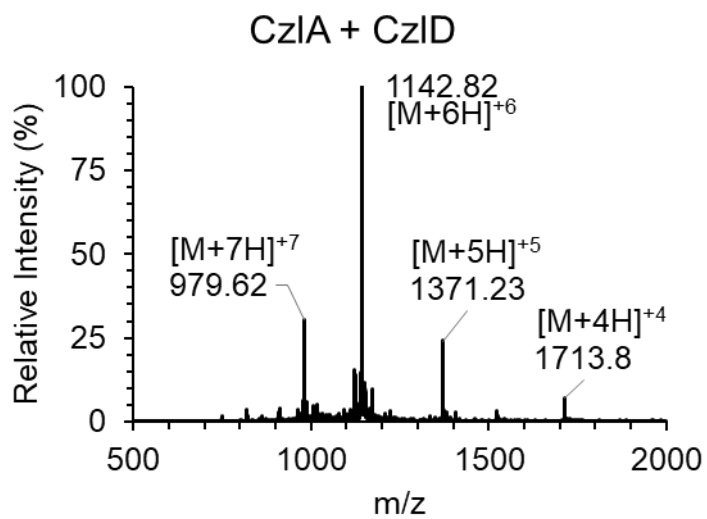

**Figure S13.** CzID does not modify CzIA when CzIBC is not present. UPLC-MS analysis of in vitro reaction of CzIA with CzID. CzIA  $MW_{\text{calc}} = 6851.36$  Da.

Figure S14. CzID and CzIBC form one heterocycle on CzIA and variants.

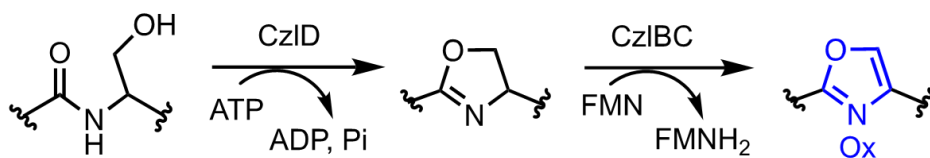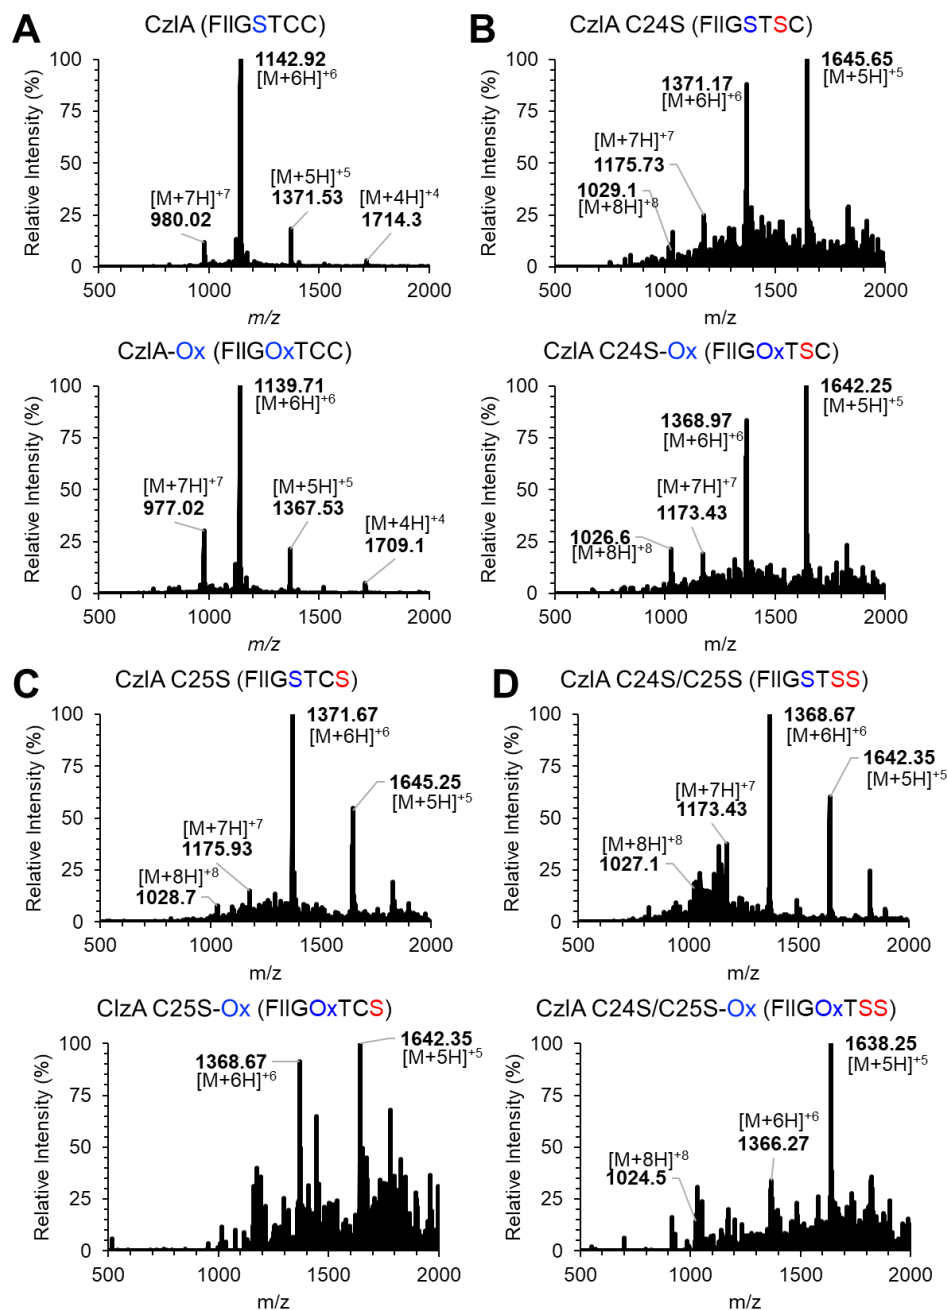

**Figure S14.** CzID and CzIBC form one heterocycle on CzIA and variants. Shown are UPLC-MS spectra of reaction products with CzIA (**A**) and the variants: C24S (**B**), CzIA

C25S (**C**), and CzIA C24S/C25S (**D**). Upper panels and lower panels correspond MS of CzIA variants before and after the reaction, respectively. Core peptide sequences are shown in parentheses, blue letters correspond to modified Ser where Ox = oxazole, red letters indicate amino acid substitutions. See Tables S7 and S8 for calculated and observed masses.

Figure S15. MS/MS sequencing of oxazole-containing CzIA C24S/S25S.

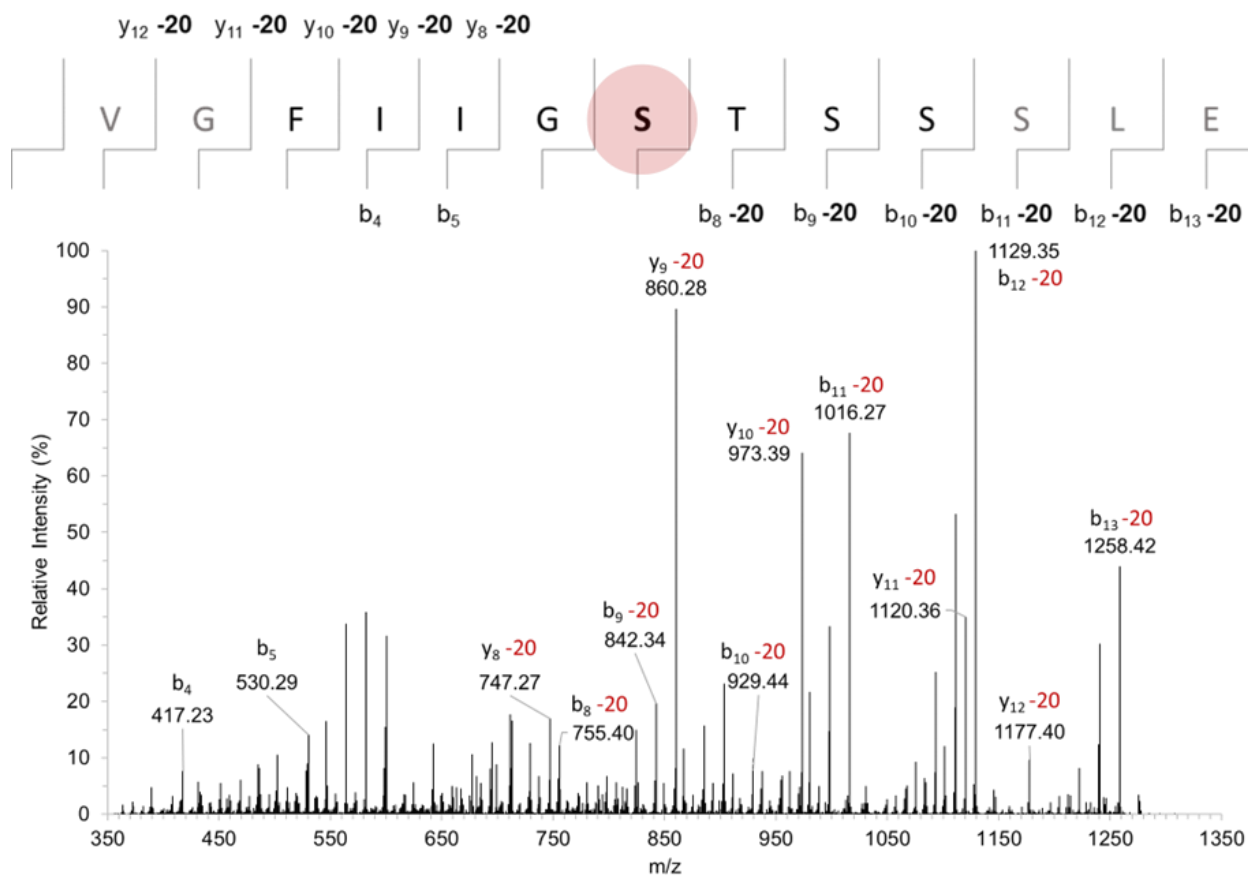

**Figure S15.** MS/MS sequencing of oxazole-containing CzIA C24S/S25S. The peptide was trimmed with GluC to release the residues 16 through 28 (shown above), which was then sequenced by fragmentation of the molecular ion ( $m/z = 1276.6$ ,  $[M+H]^+$ ). The modified Ser22 residue is highlighted as a red sphere. Ions that deviate by 20 Da less than the expected value for the native sequence, and thus contain a single oxazole, are indicated.



Figure S16. Supporting structural predictions for CzII AlphaFold models.

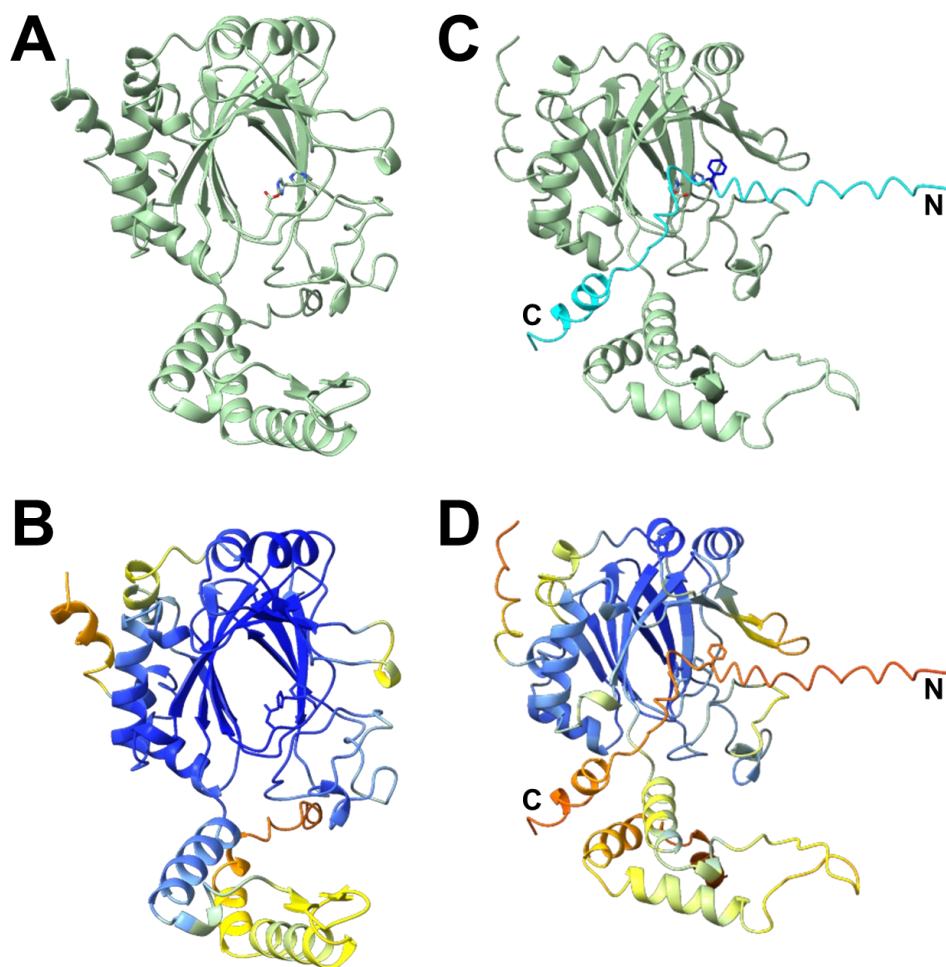

**Figure S16.** Supporting structural predictions for CzII AlphaFold2 models. **(A)** CzII. His 145, Asp 147, and His 224 are shown as sticks coloured by heteroatom. **(B)** CzII coloured by pLDDT scoring. **(C)** CzIA (cyan) complexed with CzII (green). Phe18 of CzIA is shown as blue sticks. **(D)** CzIA complexed with CzII coloured by pLDDT scoring.

Figure S17. Structural alignment of CzII with asparaginyl hydroxylase YxbC

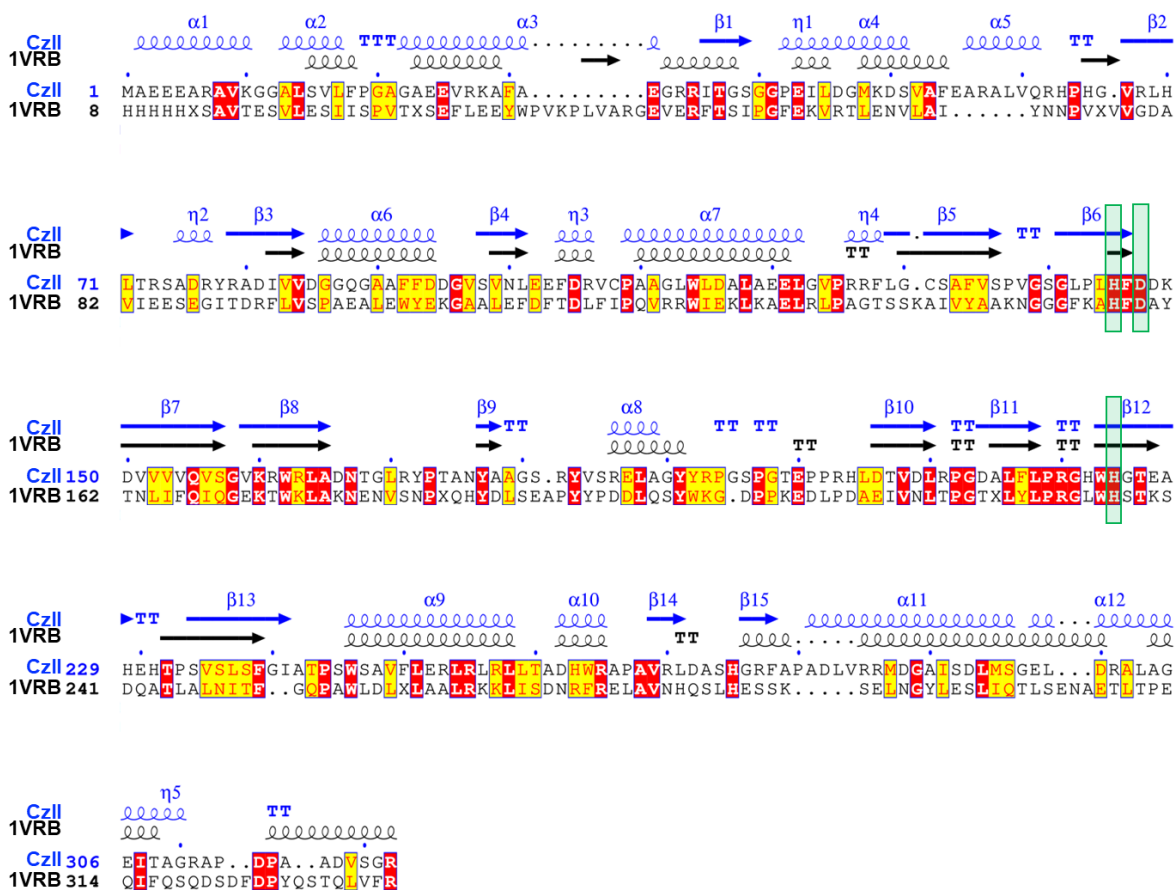

**Figure S17.** Structure based sequence alignment of CzII and putative asparaginyl hydroxylase YxbC. The AlphaFold model for CzII was aligned to the hydroxylase (PDB ID: 1VRB-A) using ENDscript 2.0.<sup>9</sup> The resulting sequence alignment was annotated using ESPript 3.0.<sup>9</sup> The predicted iron-coordinating residues are highlighted with green bars.

Figure S18. Hydroxylation of CzIA by the Fe/2OG dioxygenase CzII

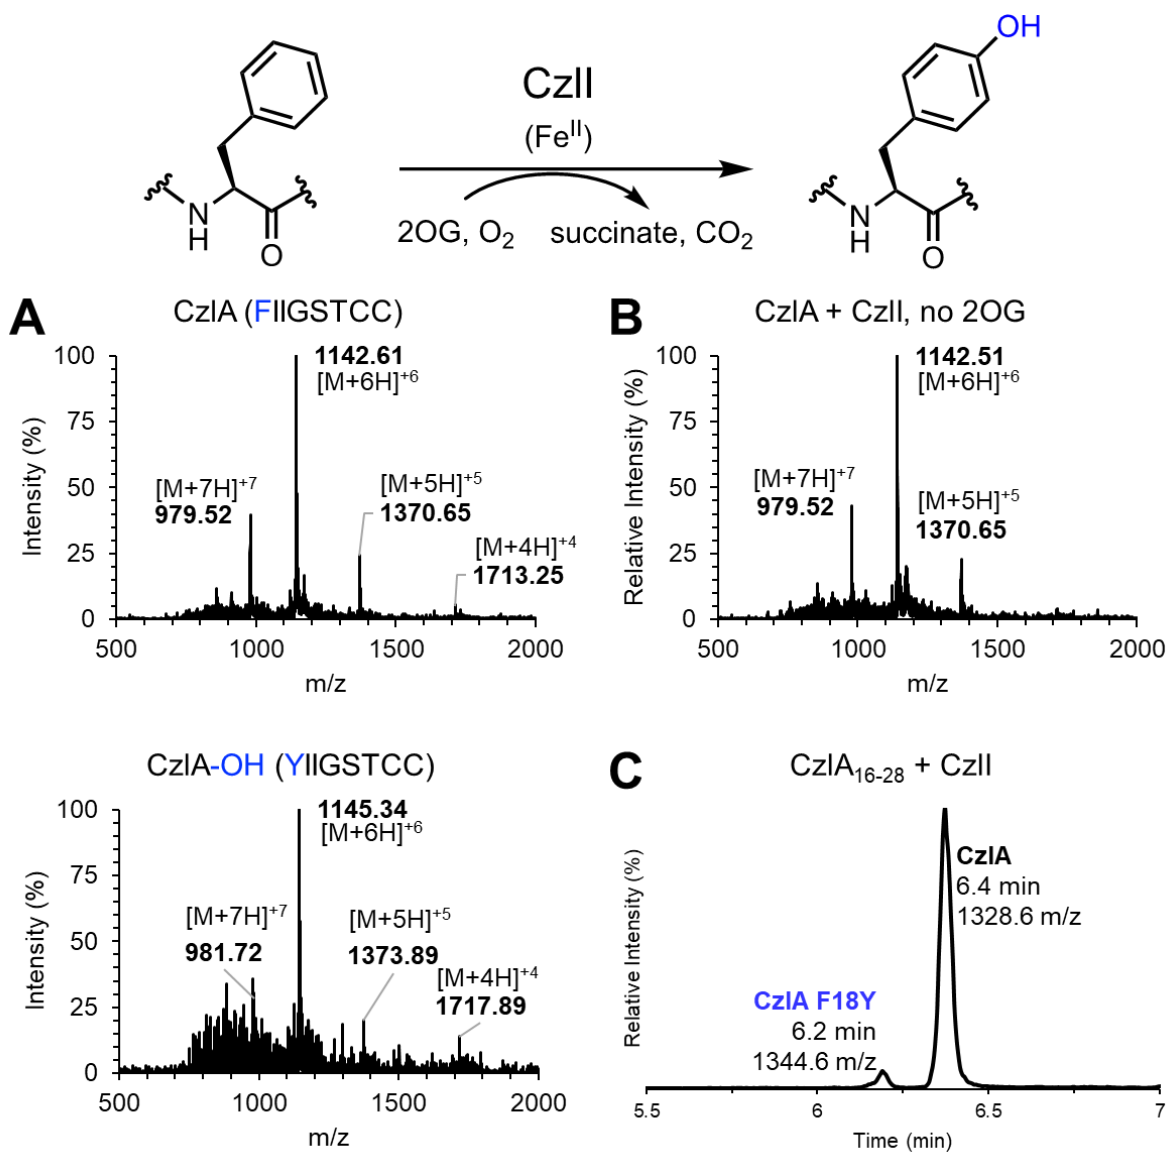

**Figure S18.** Hydroxylation of CzIA by the Fe/2OG dioxygenase CzII. (A) UPLC-MS spectra of CzIA (upper panel) and CzIA following reaction with CzII (lower panel). (B) Reaction of CzIA with CzII in the absence of 2-oxoglutarate (2OG). See **Table S9** for calculated and observed masses. (C) UPLC-MS SIR chromatogram at 1328.6 and 1344.6 m/z for the reaction of CzIA<sub>16-28</sub>, produced by proteolysis by GluC, with CzII.

Figure S19. CzIA F18G is not modified by CzII

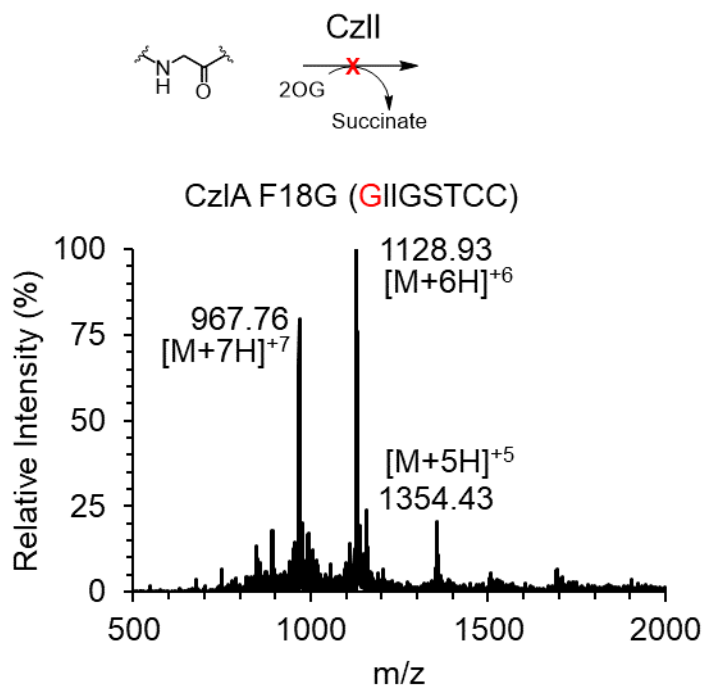

**Figure S19.** CzII does not modify CzIA F18G. UPLC-MS analysis of in vitro reaction of CzIA F18G with CzII. Unmodified CzIA F18G  $MW_{\text{calc}} = 6770.25$  Da. The core peptide sequence is shown in parentheses.

Figure S20. The Fe/2OG dioxygenase CzII creates a tyrosine residue on precursor peptide CzIA.

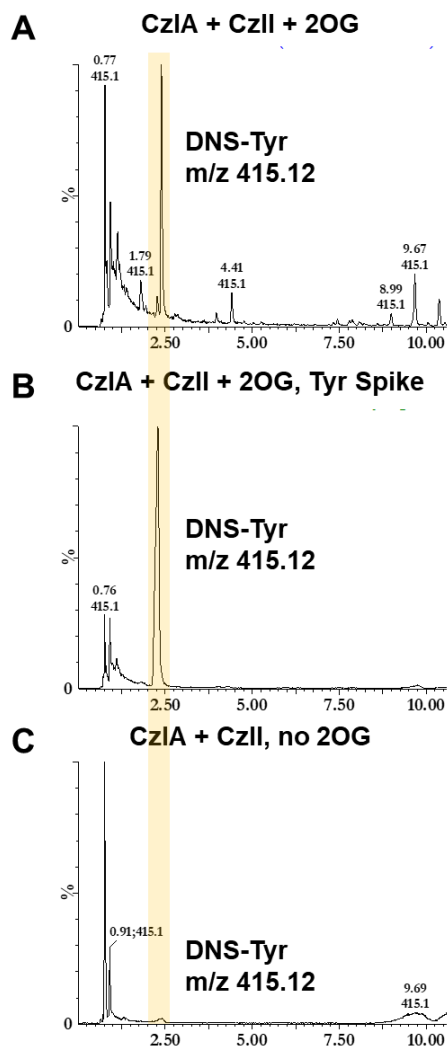

**Figure S20.** The Fe/2OG dioxygenase CzII creates a tyrosine residue on precursor peptide CzIA. UPLC-MS analysis of CzIA following reaction with CzII, total peptide hydrolysis, and dansylation of the resulting amino acids. The chromatograms show single ion recordings for  $m/z = 415.12$  corresponding to dansylated L-tyrosine (DNS-Tyr), with corresponding peak highlighted in yellow. **(A)** CzIA after reaction with CzII. **(B)** Addition of DNS-Tyr standard to the previous sample. **(C)** Analysis of CzIA following reaction with CzII in the absence of the co-substrate 2OG.

Figure S21. UPLC-MS analysis of dansylated tyrosine structural isomers.

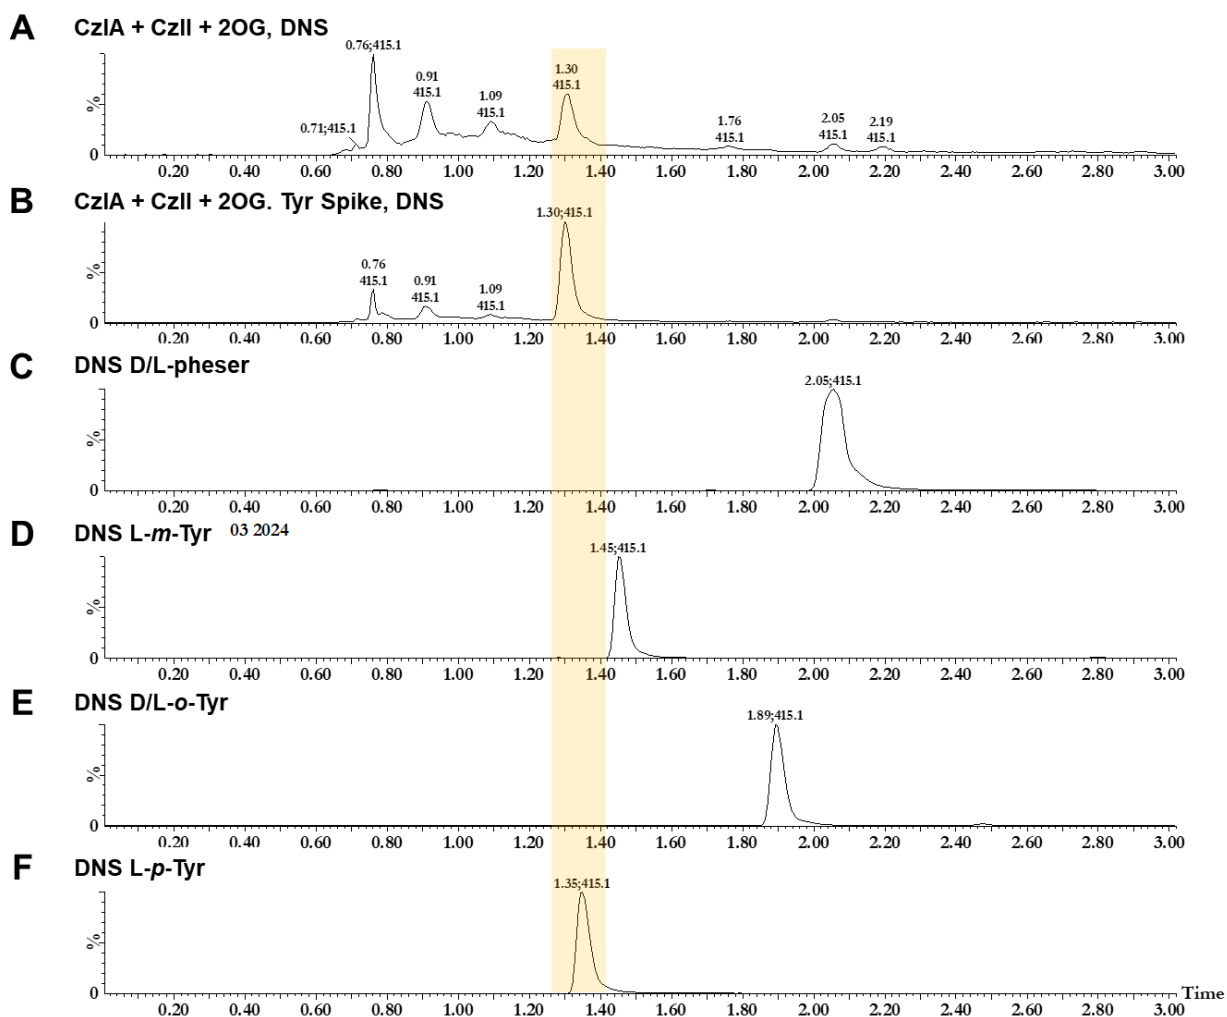

**Figure S21.** UPLC-MS analysis of dansylated tyrosine structural isomers. The chromatograms show single ion recordings for  $m/z$  415.12 corresponding to dansylated tyrosine isomers. **(A)** CZIA following reaction with CzII, total peptide hydrolysis, and dansylation of the resulting amino acids. **(B)** Addition of dansylated L-Tyr to the previous sample. **(C)** dansylated D/L-phenylserine. **(D)** dansylated L-meta-Tyr. **(E)** dansylated D/L-ortho-Tyr **(F)** dansylated L-Tyr.

## Supplementary Experimental Methods

### General

Reagents and solvents were obtained from Sigma-Aldrich, Fisher Scientific, Fluka, or Bioshop Life Science Products and used without further purification. Tryptic soy broth (TSB) was obtained from EMD Millipore. Solvents used in flash chromatography were of HPLC-grade. Silica gel flash chromatography was conducted on Silia-P Flash Silica Gel (40-63  $\mu\text{m}$ , Silicycle). Flash chromatography was performed on a Biotage SP1 system. UV-visible spectra were recorded in  $\text{CH}_2\text{Cl}_2$  on a Perkin-Elmer Lambda XLS+ UV-visible spectrophotometer. IR spectra were recorded on a Bruker Alpha Platinum ATR FT-IR spectrometer. Optical rotation measured with Anton-Parr MCP200 Polarimeter. NMR spectra were recorded on a Bruker UltraShield 600 MHz and a Bruker Ascend 700 MHz NMR spectrometer with  $\text{CDCl}_3$  as a solvent. High resolution ESI-MS experiments were performed on a Thermo Scientific Orbitrap Velos Pro instrument.

The bacterial strains and plasmids used in this study are described in Table 1. Streptomyces strains were grown on solid or liquid media supplemented with antibiotics at the following concentrations where appropriate: apramycin, kanamycin, hygromycin:  $50 \mu\text{g mL}^{-1}$ ; ampicillin,  $100 \mu\text{g mL}^{-1}$ ; Fosfomycin,  $200 \mu\text{g mL}^{-1}$ . Streptomyces strains were stored suspending mycelium in 50% glycerol or 25% sucrose and freezing at  $-80^\circ\text{C}$ . For growth on solid media, glycerol stocks were streaked onto mannitol-soya (MS) agar (Per litre: 20 g D-mannitol, 20 g soy protein, 20 g agar, 10 mM  $\text{MgCl}_2$ , pH 7.2). Production medium consisted of (per litre): 20 g starch, 10 g glucose, 5 g peptone, 5 g yeast extract, 4 g NaCl, 0.5 g  $\text{K}_2\text{HPO}_4$ , 0.5 g  $\text{MgSO}_4$ , 2 g  $\text{CaCO}_3$ .

### Large scale production and purification of curacozole

For large scale production of curacozole, a TSB culture of *S. curacoii* / pTESa-*bldA* was used to inoculate (2.5 % v/v) 1 L of production media in a 2.8 L baffled Fernbach flask containing a corrosion resistant metal spring (1 cm diameter) coiled into 12 cm diameter loop. The production cultures were incubated at 28°C, 180 rpm, for 7 days. *S. curacoii* / pTESa-*bldA* cells from the production cultures (6 L) were removed by centrifugation (4 °C, 2600 x g) and the resulting supernatant returned to the shake flasks. Amberlite XAD4 beads were added to the supernatant at 20 g L<sup>-1</sup> and shaken at 28°C and 180 rpm for 2 hrs. The cell pellet and collected XAD4 beads were washed with acetone (4 L) and the solvent evaporated in vacuo to afford an aqueous concentrate (~500 mL). The aqueous extract was defatted by extracting with petroleum ether (3 x 500 mL) followed by extraction with n-butanol (3 x 500 mL). The solvent was removed in vacuo and the concentrate loaded onto a Biotage C18HS samplet and separated by linear gradient from 5% acetonitrile to 95 % acetonitrile over 90 minutes. Fractions containing the 741 *m/z* ion corresponding to curacozole were pooled, concentrated in vacuo, and subjected to flash silica gel chromatography using a stepwise gradient of 2%, 4%, and 6% MeOH in CH<sub>2</sub>Cl<sub>2</sub>. Evaporation of the curacozole containing fractions afforded 251 mg of an amorphous yellowish-white solid.

### Cloning and Mutagenesis of the Curacozole BGC

#### Generation of pTESa-*czI*, pTESa-*czI*/Δ*I*, and pTESa-*czI*/Δ*JK*

Genomic DNA (gDNA) was isolated from *S. curacoii* DSM40107 using the salting-out method.<sup>4</sup> A ~11 kbp sequence containing the curacozole BGC (spanning from *czI* to *czK*) was amplified by PCR from *S. curacoii* gDNA using primers cur-*xbalfw* and cur-*EcoRIrv*



(Table S5) and PrimeStar GXL DNA polymerase (Takara Bio). The resulting PCR product was treated with XbaI and EcoRI then ligated into the corresponding sites of pBSK. Subsequently the *czI* sequence was subcloned into the XbaI and EcoRI sites of the streptomyces integrative plasmid pTESa (Table S4), yielding pTESa-*czI*. The plasmids pTESa-*czI*ΔI and pTESa-*czI*ΔJK were generated similarly by PCR using the primer pairs *czIdell* fw<sub>xbaI</sub> / *cur2* for pTESa-*czI*ΔI and *cur-xbaI* fw / *czIdelJ* rv for pTESa-*czI*ΔJK, which amplify sequences that exclude the flanking genes *czII* and *czIJ* / *K* (Table S5). The resulting PCR products were digested with XbaI, then ligated into the XbaI (sticky) and EcoRV (blunt) sites of pTESa. The resulting pTESa-*czI*, pTESa-*czI*ΔI, and pTESa-*czI*ΔJK plasmids were transformed into *E. coli* ET12567 / pUZ8002 cells then introduced into *S. coelicolor* CH999 via intergeneric conjugation.

#### Generation of pTESa-*czI*ΔC1, pTESa-*czI*ΔD, pTESa-*czI*ΔF, pTESa-*czI*ΔBC

Single gene deletions of *czI*C1, *czI*D, *czI*F, and *czI*BC within pTESa-*czI* were performed using the λ-RED based recombination protocol described by Gust and co-workers<sup>5</sup>. Primer pairs were designed with the following elements: (1) 5'-sequences of approximately 40 bp that are complimentary to the regions that flank the gene to be deleted, (2) 3'-sequences to amplify the spectinomycin resistance gene from pCDFDuet\_1, and (3) a SpeI restriction site between the 5'- and 3'-sequences (**Table S5**). PCR reactions with each primer pair and pCDFDuet\_1 therefore generate a PCR product containing a spectinomycin resistance gene flanked by SpeI sites and 40 kb homology sequences that target the gene of interest. Each PCR product was purified by agarose gel electrophoresis then electroporated into *E. coli* BW25113 cells containing the plasmid pTESa-*czI* and the plasmid pIJ790 encoding the λ-phage Red proteins<sup>5</sup>.

Transformants were selected on LB-agar containing apramycin (to select for pTESa-czI) and spectinomycin (to select for the integrated PCR product). The resulting *E. coli* clones contained pTESa-czI where the targeted gene on the plasmid had been replaced by the streptomycin resistance gene via  $\lambda$ -Red mediated homologous recombination (**Figure S5**). The desired mutations in pTESa-czI were verified by PCR. Next, the pTESa-czI derivative was treated with SpeI then re-ligated to remove the spectinomycin resistance gene, thereby leaving a short SpeI recognition sequence in place of the original czI gene that was deleted. The resulting pTESa-czI gene deletion derivatives were then transformed into *S. coelicolor* CH999 or *S. lividans*  $\Delta$ YA9 by intergeneric conjugation from *E. coli*.

#### Deletion of czI/B1 and czI/E in *S. curacoii* / pTESa-bldA

To replace czI/B1 and czI/E in *S. curacoii* / pTESa-bldA using the apramycin resistance gene *aac(3')/IV*, it was first necessary to remove the existing *aac(3')/IV* gene from the integrated plasmid. The *attP* attachment site of pTESa-bldA is flanked by *loxP* recognition sites for Cre recombinase. This allows for removal of *aac(3')/IV* from the chromosome after integration of a gene of interest (in this case *bldA*)<sup>6</sup>. To this end, *S. curacoii* / pTESa-bldA was transformed with the plasmid pALCRE encoding the Cre recombinase by intergeneric conjugation with *E. coli* ET12567/pUZ8002 cells<sup>6</sup>. The process of cultivating the exconjugants and inducing expression of the Cre recombinase was performed as described previously<sup>6</sup>. Exconjugants were selected on the basis of sensitivity to apramycin and hygromycin, indicating successful excision of *aac(3')/IV* from the chromosome, and loss of the pALCRE plasmid. The final, marker free strain is denoted *S. curacoii-bldA*.

Single gene replacements of *cz/B1* and *cz/E* within *S. curaco**i-bldA* were performed through double cross-over utilizing the suicide plasmids pKGLP2 and pKCLP2 (Table S4). For *cz/B1*, an apramycin resistance gene was amplified by PCR from the plasmid pLERE (Table S4) using the primers *apra\_cz/B1\_fw* and *apra\_cz/B1\_rv* (Table S5). These primers carry 5'-sequences of approximately 40 bp that are complimentary to the regions that flank *cz/B1*. The PCR product was introduced by electroporation into *E. coli* BW25113 / pIJ790 cells containing the plasmid pBSK-*czI*, where  $\lambda$ -RED based recombination<sup>5</sup> replaced the *cz/B1* sequence on pBSK-*czI* with the apramycin resistance gene, yielding pBSK-*czI\_cz/B1::apra*. PCR was subsequently used to amplify a *cz/B1::apra* sequence from pBSK-*czI\_cz/B1::apra* using primers *cz/B1-fw* and *cz/B1-rv* (Table S5), yielding a PCR product containing the apramycin resistance gene flanked by ~2.5 kbp homology arms corresponding to the flanking regions of *cz/B1* within the *czI* BGC. The PCR product was then blunt-end ligated into the EcoRV site of the suicide vector pCKLP2. The resulting plasmid pCKLP2-*cz/B1::apra* was introduced into *S. curaco**i-bldA* via intergeneric conjugation from *E. coli* ET12567 / pUZ8002 cells. *S. curaco**i-bldA* /  $\Delta$ *cz/B1::apra* exconjugants containing the double-crossover deletion of *cz/B1* were selected on MS-agar then TSB containing apramycin and fosfomycin. The mutation was confirmed by PCR analysis of gDNA isolated from the mutant strain.

The *cz/E* gene was deleted in an analogous fashion. The primers *apra\_cz/E\_fw* and *apra\_cz/E\_rv* (Table S5) were used to generate a PCR product for replacement of *cz/E* in pBSK-*czI* with an apramycin resistance gene via  $\lambda$ -RED based recombination.<sup>5</sup> The primers *cz/E-fw* and *cz/E-rv* were then used to PCR amplify a sequence from pBSK-*czI\_cz/E::apra* containing ~2.5 kbp homology arms, which was subsequently blunt-end

ligated into the EcoRV site of pKGLP2 (Table S4), yielding pKGLP2-cz/E::apra. Transformation of the resulting plasmid into *S. curacoii-bldA* and selection for mutant exconjugants followed the same protocol as for cz/B1 deletion.

#### Generation of point mutations in *czIA* and heterologous production of curacozole derivatives

Single point mutations in *czIA* were generated as follows. The plasmid pTESa-czI was digested with XbaI and NdeI and the resulting fragment containing *czIA* was ligated into the XbaI / NdeI sites of pBSK. The new plasmid pBSK-czIA has a size of approximately 7.3 kbp. Primer pairs that anneal back-to-back on pBSK-czIA, with one primer carrying the point mutation, were used to amplify the entire pBSK-czIA sequence to generate a PCR product carrying the desired mutation (Table S5). Accordingly, the primer pairs FW\_fw1 and FW\_rv1 generated *czIA* F18W; CzIA-F18Y-fw and CzIA-F18Y-rv generated *czIA* F18Y; coreI\_V\_fw\_b and coreI\_V\_rv\_b generated *czIA* I20V; coreIL2fw and coreIL2rv generated *czIA*\_I20L; and czIAT\_Sfw\_JT and czIAT\_Srv\_JT generated *czIA*\_T23S. Each PCR product was treated with DpnI to digest the methylated pBSK-czIA template. Subsequently, the PCR product was purified on an agarose gel, phosphorylated using T4 polynucleotide kinase, and then self-ligated using T4-ligase. The ligation mixture was transformed into *E. coli* DH10B cells, and single colonies were selected for plasmid purification. The desired mutation was confirmed by sequencing the PCR product that was generated from the mutant plasmid using the primers CzIA\_check\_fw and CzIA\_check\_rv.

Multiple mutations in *czIA* were generated in a sequential manner. To generate a PCR product carrying the *czIA* T23S\_C24S double mutation, the pBSK-czIA\_T23S plasmid was PCR amplified with the primers coreC\_S\_fw\_a and czIAT\_Srv\_JT. This PCR

product was treated and cloned as described above, yielding pBSK-czIA\_T23S\_C24S. The mutant czIA\* sequences were subsequently reintroduced into pTESa-czI. Following confirmation by sequencing, the mutant czIA\* sequence was removed from pBSK by digestion with XbaI and NdeI, and the resulting fragment ligated into similarly digested pTESa-czI. The resulting pTESa-czI\* plasmid (where \* denotes the czI BGC with a mutation in czIA) was confirmed once again by sequencing the PCR product generated with CzIA\_check\_fw and CzIA\_check\_rv.

For analysis of curacozole derivatives, each pTESa-czI\* plasmid specifying a CzIA variant was introduced into *S. coelicolor* CH999 or *S. lividans* ΔYA9 via intergeneric conjugation. *S. coelicolor* CH999 was used to express pTESa-czI\* plasmids specifying CzIA F18Y, I20V, T23S, and T23S\_C24S variants as precursors to compounds **8**, **10**, **2**, and **11**, respectively. *S. lividans* ΔYA9 was used to express pTESa-czI\* plasmids specifying CzIA F18W and I20L variants as precursors to compounds **7** and **9**, respectively. A PCR reaction was performed on the resulting exconjugants using primers CzIA\_check\_fw and CzIA\_check\_rv, and the resulting PCR product confirmed by sequencing. The strains confirmed to carry pTESa-czI\* were cultivated and analyzed as described in **Cultivation of Streptomyces strains for analysis of curacozole and derivatives**, with the addition of a solid phase extraction step as follows. Following extraction of the culture with ethyl acetate and removing the solvent in vacuo, the sample was redissolved in 5 mL MeOH and then mixed with 5 mL water. The mixture was applied to an Oasis HLB 35cc LP Vac Cartridge (6 g, Waters Ltd.) which was then developed with a stepwise gradient of increasing MeOH in water, beginning with 50% MeOH:water and

increasing to 100% MeOH. The individual fractions were collected and analyzed as described in **LC-MS Analysis of curacozole and derivatives**.

#### DNA transformation into *E. coli* BW25113 / pIJ790 cells by electroporation

*E. coli* BW25113 / pIJ790 cells were grown overnight in LB medium at 37 °C in a shaker incubator. This pre-culture was used to inoculate (1% v/v) fresh LB medium and grown until the cell density reached an OD<sub>600</sub> of 0.4 to 0.6. The cells were then placed on ice for approximately 10 min to stop growth. Subsequently, the cells were centrifuged, washed 2-3 times with ice-cold glycerol (10%), and centrifuged again. The pellet was resuspended in approximately 80 µL 10% glycerol, mixed with 3 µL gel purified PCR product and transferred to an ice-cold electroporation cuvette. Electroporation was performed at 1.8 kV, 25 µF, and 200Ω. The cells were transferred to 1 mL of fresh LB medium, incubated in a shaker incubator at 37°C for one hour, and then spread on an LB-agar plate containing ampicillin for pBSK-*czI*, or apramycin for pTESa-*czI*. This was then incubated at 37°C overnight.

#### Plasmid transformation into *Streptomyces* by intergeneric conjugation

The desired plasmid was introduced into *E. coli* ET12567 / pUZ8002 via heat-shock or electroporation. The cells were then cultured overnight in LB media supplemented with apramycin and kanamycin. 1% (v/v) of this culture was transferred to fresh medium and grown until the cell density reached an OD = 0.6. The cells were then centrifuged, washed approximately 2 times with LB medium, centrifuged again, and resuspended in approximately 500 µL of TSB. *Streptomyces* strains were prepared for conjugation either as mycelium or spores. The mycelial culture was also centrifuged, washed 2 times with

TSB medium, centrifuged again, and resuspended in approximately 500  $\mu$ L of TSB medium. Subsequently, the *E. coli* ET12567 / pUZ8002 and *Streptomyces* cells were mixed and spread on a MS-agar plate containing 10 - 50 mM CaCl<sub>2</sub>. Dilutions were performed if the cell concentration was too high. Spores, on the other hand, were first added to approximately 500  $\mu$ L of TSB and reactivated at 50°C for 10 min. After cooling, the spores were mixed with *E. coli* ET12567 / pUZ8002 cells and added to an MS agar plate without antibiotics for 6 – 8 hours at 28°C to ensure DNA transmission. The plate was then flooded with a solution of the appropriate antibiotic (e.g. apramycin for pTESa) and fosfomicin (to eliminate the *E. coli* ET12567 / pUZ8002 cells) and allowed to dry. The plate was then incubated for 5 – 7 days at 28°C. Colonies corresponding to exconjugants were picked and regrown on MS-agar plates supplemented with the appropriate antibiotic.

#### Cultivation of *Streptomyces* strains for analysis of curacozole and derivatives

A cell freezer stock was used to inoculate 50 mL TSB supplemented with the appropriate antibiotic in a 300 mL baffled flask (containing a non-corroding spring), which was then incubated overnight at 28°C and 180 rpm. This pre-culture was used to inoculate (2% v/v) 200 mL production medium without any antibiotics in a baffled 1L flask (containing a non-corroding spring), which was then incubated for 5 days at 28°C, 180 rpm. The cells were removed by centrifugation. To the supernatant, an equal volume of ethyl acetate was added then mixed for 30 min. The organic phase was separated, and the solvent removed in vacuo. The resulting extract was redissolved in methanol for LC-MS analysis as described in **LC-MS Analysis of curacozole and derivatives**.

#### Cloning of *czI* specified proteins

**CzIA.** The *czIA* sequence was PCR amplified from *S. curacoii* gDNA using primers 5'-ggtgccgcgcggcagccaAATGTTTCGAGAACACGACCG-3' and 5'-caccagtcatgctagccaTCAGACGGCCTCGGTCTC-3'. PCR was performed with Herculase II Fusion DNA polymerase (Agilent Technologies) in a reaction containing 6% DMSO, 0.25  $\mu$ M dNTPs, 0.25  $\mu$ M each primer, and Herculase II reaction buffer. PCR began with denaturation at 95 °C for 2 min, followed by 30 cycles of denaturation (95 °C, 20s), annealing (54-62 °C, 20 s) and extension (72 °C, 30 s). A final extension was held at 72 °C for 3 min. The resulting PCR product was inserted into the NdeI site of pET28a by Gibson assembly. The resulting pET28a-*czIA* encodes CzIA with an N-terminal His<sub>6</sub> tag. The plasmid was verified by DNA sequencing.

**CzIA Variants.** The *E. coli* codon optimized genes encoding CzIA variants C24S, C25S, C24S/C25S, and F18G were synthesized and cloned into the NcoI and EcoRI sites of pET28a by Bio Basic (Canada). These sequences specify variants with N-terminal His<sub>6</sub> tags. The expressed sequences of CzIA and variants are listed in Table S7.

**CzID.** The codon optimized *czID* gene was synthesized by Bio Basic (Canada) and cloned into pET100 / D-TOPO using the Champion™ pET Directional TOPO® Expression Kit (Invitrogen). The sequence specifies CzID with a N-terminal His<sub>6</sub> tag.

**CzIBC.** The codon optimized *czIBC* gene was synthesized and cloned into the NdeI and XhoI sites of pET21a by Bio Basic (Canada). The sequence specifies CzIBC with a C-terminal His<sub>6</sub> tag.



**CzII.** The *czII* sequence was PCR amplified from *S. curacoii* genomic DNA using primers 5'-gacagcaaatgggtcgcgATATGGCCGAGGAGGAAGCA-3' and 5'-cgacggagctcgaattcgTACAACGACCGCTGACATCG-3'. PCR was performed with Herculase II Fusion DNA polymerase (Agilent Technologies) in a reaction containing 6% DMSO, 0.25  $\mu$ M dNTPs, 0.25  $\mu$ M each primer, and Herculase II reaction buffer. PCR began with denaturation at 95 °C for 2 min, followed by 30 cycles of denaturation (95 °C, 20s), annealing (54-62 °C, 20 s) and extension (72 °C, 30 s). Final extension was held at 72 °C for 3 min. The resulting PCR product was cloned into pET28a linearized with BamHI using Gibson assembly. The resulting plasmid pET28a-*czII* specifies CzII with with N- and C-terminal His<sub>6</sub> tags. The plasmid was verified by DNA sequencing.

#### Expression and purification of *czI* specified proteins.

Plasmids were transformed into the *E. coli* BL21 (DE3) heat shock competent cells and plated on LB agar with the appropriate antibiotic (50  $\mu$ g/mL kanamycin for *czI* sequences in pET28a; 100  $\mu$ g/mL ampicillin for *czI* sequences in pET100 and pET21a). The plates were grown overnight at 37 °C. A single colony was used to inoculate 25 mL LB broth with the appropriate antibiotic (either 50  $\mu$ g/mL kanamycin or 100  $\mu$ g/mL ampicillin) in a 125 mL flask. This starter culture was grown overnight at 37 °C, 200 rpm. Next, 1 L LB broth containing the appropriate antibiotic was inoculated with 20 mL (2% vol/vol) from the starter culture. The culture was grown at 37 °C, 180 rpm until the cell density reached OD<sub>600</sub> ~0.6, then incubated on ice for 30 min. IPTG was added to a final concentration of 1 mM. Cultures expressing CzIA and variants were incubated at 30 °C and all others at 20 °C, for 20 hours, shaking at 200 rpm. The cultures were centrifuged at 5000  $xg$  for 30

min at 4 °C, and the supernatant was discarded. The cell pellet was resuspended in ice cold Buffer A (Table S6) then lysed by 3 passes through an EmulsiFlex-C5 homogenizer (Avestin, Ottawa) at 15,000 psi. The lysate was cleared by centrifugation at 28 000 xg for 30 min at 4 °C using a Thermo Fisher Scientific Sorvall Lynx 6000 Superspeed Centrifuge. Ni-NTA Superflow (Qiagen) resin (5.0 mL) was packed into an XK-16 column (Cytiva) equilibrated with Buffer A for 10 column volumes (CV) using an AKTA FPLC system. The clarified lysate was filtered through a 0.45 µm polyethersulfone membrane and loaded onto the column. The column was developed at a flow rate of 5.0 mL/min as follows: 100% Buffer A for 5 CV; 4% Buffer B for 5 CV; a linear gradient to 100% Buffer B over 10 CV; 100% B for 2 CV. The eluted fractions were analyzed by SDS-PAGE. Fractions containing pure protein were pooled for exchange into Buffer C by ultrafiltration using centrifugal filter units.

#### AlphaFold predictions and structural analysis

Native protein sequences were submitted to ColabFold: AlphaFold2 using MMseqs2 for structural predictions.<sup>10</sup> The top ranked models were selected for heuristic PDB searches using the DALI server.<sup>11</sup> To model CzIA-enzyme complexes, native protein sequences were submitted with specified inter-protein chain breaks, to ColabFold AlphaFold2 using MMseqs2 for structural predictions. Structural images were prepared in PyMOL.<sup>12</sup> Electrostatic surface potentials were calculated by submission of the calculated structures to the Adaptive Poisson-Boltzmann Solver (APBS) through the PyMOL plugin.<sup>13</sup> Pairwise structural alignments were performed using the jFATCAT algorithm<sup>8</sup> through the PDB server (<https://www.rcsb.org/alignment>). The corresponding sequence based amino acid sequence alignments were annotated using ESPript 3.0.<sup>9</sup>

#### CzID and CzIBC Activity Assays

Reaction mixtures consisted of 5  $\mu$ M CzID, 5  $\mu$ M CzIBC, 50  $\mu$ M CzIA (or variants), 5 mM  $MgCl_2$ , 5 mM ATP, 50  $\mu$ M FMN, and 5 mM TCEP (except with CzIA C24S/C25S which lacks Cys residues) in 25 mM Tris-HCl and 10 mM KCl (pH 7.5). The reactions were incubated at 25 °C for 20 hours prior to analysis. UPLC-MS analysis of modified CzIA peptides was performed as described below (see **UPLC-MS Analysis of CzIA**). The modified peptide was sequenced by MS/MS as described below (see **LC-MS/MS Peptide Sequencing of CzIA**).

#### CzII Activity Assay

Assays were performed with 5  $\mu$ M CzII, 50  $\mu$ M CzIA, 1 mM 2-oxoglutarate, 100  $\mu$ M ferrous ammonium sulphate, and 200  $\mu$ M ascorbate in 25 mM Tris-HCl and 10 mM KCl (pH 7.5). Reactions were incubated at 25 °C for 20 hours prior to analysis. Conversion of CzIA to the hydroxylated product was monitored by UPLC-MS (see **UPLC-MS Analysis of CzIA**). The modified peptide was sequenced by MS/MS as described below (see **LC-MS/MS Peptide Sequencing of CzIA**). Analysis of individual amino acids was achieved by heating 50  $\mu$ L of the assay mixture at 60 °C for 10 min to precipitate enzyme and centrifuging at 16,000 rcf for 10 min. The supernatant was removed and loaded into a 1 mL vacuum hydrolysis tube (ThermoFisher Scientific, Catalog Number 29570) with 450  $\mu$ L of 6N HCl. The tube was flushed with  $N_2$  gas, placed under vacuum, sealed, then heated in an oven at 105 °C for 20 hours. The sample was allowed to cool at room temperature, dried by rotary evaporator, resuspended in 2 mL  $H_2O$ , then dried again by lyophilization. After drying, sample was dissolved in 50  $\mu$ L  $H_2O$  then mixed with 10  $\mu$ L of

10  $\mu$ L of 1 M boric acid buffer (pH 8.5) and 10 mM dansyl chloride (in acetonitrile). Amino acid standards were derivatized following the same procedure. UPLC-MS analysis of derivatized amino acids was performed as described below (see **UPLC-MS Analysis of Dansylated Amino Acids Derived from CzIA**).

#### LC-MS analysis of curacozole and derivatives

Methanol extracts containing curacozole or derivatives were resolved on a Thermo Fisher LC-MS UltiMate 3000 instrument equipped with a Waters XBridge C18 column (100 mm x 4.6 mm, 3.5  $\mu$ M). The column was maintained at 30°C and developed at a flow rate of 0.5 mL min<sup>-1</sup> using a gradient comprised of 0.5% acetic acid in H<sub>2</sub>O (solvent A) and 0.5% acetic acid in acetonitrile (solvent B). The gradient was as follows: 0 to 0.5 min: 95% A, 5% B; 0.5 to 18.5 min: linear gradient to 5% A, 95% B; 18.5 to 20.5 min: hold at 5% A, 95% B; 20.5 to 20.8 min: linear gradient to 95% A, 5% B; 20.8 to 25 min: hold at 95% A, 5% B. The MS settings in ESI positive ion mode were as follows: spray voltage, 2500 V; vaporizer temp., 450°C; sheath gas pressure, 30 arbitrary units; auxiliary gas pressure, 5 au; capillary temperature, 320°C.

#### UPLC-MS Analysis of CzIA

Reactions involving precursor peptide CzIA were treated with 1:1 v/v acetonitrile to precipitate enzymes then centrifuged at 16,000 rcf for 5 min. The supernatant was collected for CzIA analysis on a Waters Acquity™ UPLC-MS instrument using a Waters CORTECS T3 column (1.6  $\mu$ M, 2.1mm X 100 mm) maintained at 40 °C. The column was developed with water (A), acetonitrile (B) and 1% formic acid in water (C) as follows: 10%

C maintained throughout the method; 5% B held for 2 min, followed by a linear gradient to 20% B over 1 min, then a linear gradient to 80% B over 7 min, then to 90% B over 1 min. The MS scan covered 50-2000 m/z with cone voltage of 35 V in ES+ ionization mode with source temperature of 150°C and desolvation temperature of 400 °C. Selective ion recording was used to detect dansylated amino acids.

#### LC-MS/MS Peptide Sequencing of CzIA

Prior to MS/MS, assay samples were heated at 60 °C for 5 min to precipitate enzymes. The supernatant was collected for proteolysis by GluC at 37 °C for 16 hours. After completion, proteolyzed assay samples were mixed 1:1 v/v with acetonitrile and centrifuged at 16,000 rcf for 5 min. The supernatant was collected for MS/MS analysis on a Thermo Scientific Orbitrap Velos Pro instrument coupled with an Agilent 1100 HPLC. The samples were resolved using a CORTECS C18 column (5 cm, 1.6 µm) maintained at 40 °C and a solvent system comprised of water with 0.1 % formic acid (A) and acetonitrile with 0.1 % formic acid (B). Samples were eluted from the column with 90 % B over 10 minutes at a flow rate of 0.3 mL/min. MS was equipped with heated electrospray ion source running in positive ion mode with the following ion source parameters: high voltage 3.5 kV, evaporation temperature 350 °C, sheath gas 30 arbitrary units (arb), aux gas 10 arb, and ion transfer tube temperature 300 °C. The MS/MS method was programmed for each run to select the ion of interest, then fragmentation was performed using the ion trap with collision-induced dissociation set to 35 V.

## UPLC-MS Analysis of Dansylated Amino Acids Derived from CzIA

A Waters Acquity™ Ultra High-Performance Liquid Chromatography Mass Spectrometry instrument was used to analyze the dansylated amino acids using a CORTECS T3 column (1.6  $\mu$ M, 2.1mm X 100 mm) maintained at 30 °C. The column was developed with water (A), acetonitrile (B) and 1% formic acid in water (C) as follows: 10% C maintained throughout the method; 30 % B held for 1 min, followed by a linear gradient to 85% B over 25 min. MS scans were collected from 85 to 500 m/z with a cone voltage of 15 V in ES+ ionization mode, a source temperature of 150 °C, and a desolvation temperature of 400 °C. Selective ion recordings were used as indicated.

## References

- 1 A. Gessner, T. Heitzler, S. Zhang, C. Klaus, R. Murillo, H. Zhao, S. Vanner, D. L. Zechel and A. Bechthold, *ChemBioChem*, 2015, **16**, 2244–2252.
- 2 R. McDaniel, S. Ebert-Khosla, D. A. Hopwood and C. Khosla, *Science*, 1993, **262**, 1546–1550.
- 3 Y. Ahmed, Y. Rebets, M. R. Estévez, J. Zapp, M. Myronovskyi and A. Luzhetskyy, *Microb. Cell Fact.*, 2020, **19**, 5.
- 4 T. Kieser, M. J. Bibb, M. J. Buttner, K. F. Chater and D. A. Hopwood, *Practical Streptomyces Genetics*, The John Innes Foundation, Norwich, United Kingdom, 2000.
- 5 B. Gust, G. L. Challis, K. Fowler, T. Kieser and K. F. Chater, *Proc. Natl. Acad. Sci. USA*, 2003, **100**, 1541–1546.
- 6 S. Herrmann, T. Siegl, M. Luzhetska, L. Petzke, C. Jilg, E. Welle, A. Erb, P. F. Leadlay, A. Bechthold and A. Luzhetskyy, *Appl. Environ. Microbiol.*, 2012, **78**, 1804–1812.
- 7 M. Myronovskyi, E. Welle, V. Fedorenko and A. Luzhetskyy, *Appl. Environ. Microbiol.*, 2011, **77**, 5370–5383.
- 8 Z. Li, L. Jaroszewski, M. Iyer, M. Sedova and A. Godzik, *Nucleic Acids Res.*, 2020, **48**, W60–W64.
- 9 X. Robert and P. Gouet, *Nucleic Acids Res.*, 2014, **42**, W320–W324.
- 10 M. Mirdita, K. Schütze, Y. Moriwaki, L. Heo, S. Ovchinnikov and M. Steinegger, *Nat. Methods*, 2022, **19**, 679–682.
- 11 L. Holm, *Nucleic Acids Res.*, 2022, **50**, W210–W215.

12 The PyMOL Molecular Graphics System (version 1.2r3pre) Schrödinger, LLC.

13 E. Jurrus, D. Engel, K. Star, K. Monson, J. Brandi, L. E. Felberg, D. H. Brookes, L. Wilson, J. Chen, K. Liles, M. Chun, P. Li, D. W. Gohara, T. Dolinsky, R. Konecny, D. R. Koes, J. E. Nielsen, T. Head-Gordon, W. Geng, R. Krasny, G.-W. Wei, M. J. Holst, J. A. McCammon and N. A. Baker, *Protein Science*, 2018, **27**, 112–128.
